1        **Differential expression of genes influencing mitotic processes in cord blood mononuclear cells**  
2        **after a pre-conceptual micronutrient-based randomized controlled trial: Pune Rural Intervention**  
3        **in Young Adolescents (PRIYA)**

4        Satyajee P. Khare<sup>1,2#</sup>, Ayush Madhok<sup>1#</sup>, Indumathi Patta<sup>1</sup>, Krishna K. Sukla<sup>3</sup>, Vipul V. Wagh<sup>2</sup>, Pooja S.  
5        Kunte<sup>3</sup>, Deepa Raut<sup>3</sup>, Dattatray Bhat<sup>3</sup>, Kalyanaraman Kumaran<sup>4</sup>, Caroline Fall<sup>4</sup>, Utpal Tatu<sup>5</sup>, Giriraj R.  
6        Chandak<sup>6</sup>, Chittaranjan S. Yajnik<sup>3\*</sup>, Sanjeev Galande<sup>1, 7\*</sup>

7        1. Centre of Excellence in Epigenetics, Department of Biology, Indian Institute of Science  
8        Education and Research (IISER), Pune, India

9        2. Symbiosis School of Biological Sciences (SSBS), Symbiosis International (Deemed University),  
10        Lavale, Pune, India

11        3. Diabetes Unit, King Edward Memorial Hospital and Research Centre, Pune, India

12        4. Medical Research Council Lifecourse Epidemiology Centre, Southampton, UK

13        5. Indian Institute of Science (IISc), Bangalore, India

14        6. Genomic Research on Complex diseases (GRC-group), CSIR-Centre for Cellular and Molecular  
15        Biology (CSIR-CCMB), Hyderabad, India

16        7. Department of Life Sciences, Shiv Nadar University, Gautam Buddha Nagar, Uttar Pradesh,  
17        India.

18        # These authors contributed equally

19        \* **For correspondence:**

20        [csyajnik@gmail.com](mailto:csyajnik@gmail.com)

21        [sanjeev@iiserpune.ac.in](mailto:sanjeev@iiserpune.ac.in)

22        **Keywords:** Vitamin B12 and micronutrients, randomized controlled trial, cord blood mononuclear  
23        cells, gene expression profiling, cell cycle, mitotic processes.

24

25

## 1 **Abstract**

2 In The Pune Maternal Nutrition Study, vitamin B12 deficiency was seen in 65% of pregnant women,  
3 folate deficiency was rare. Maternal total homocysteine concentrations were inversely associated  
4 with offspring birthweight, and low vitamin B12 and high folate concentrations predicted higher  
5 offspring adiposity and insulin resistance. These findings guided a nested pre-conceptual  
6 randomized controlled trial 'Pune Rural Intervention in Young Adolescents (PRIYA)'. The  
7 interventions included: 1) vitamin B12+multi-micronutrients the United Nations International  
8 Multiple Micronutrient Antenatal Preparation (UNIMMAP) and proteins (B12+MMN), 2) vitamin B12  
9 (B12 alone), and 3) placebo. Intervention improved maternal pre-conceptual and in-pregnancy  
10 micronutrient nutrition. Gene expression analysis in cord blood mononuclear cells in 88 pregnancies  
11 revealed 75 differentially expressed genes between the B12+MMN and placebo groups. The  
12 enriched biological processes included G2/M phase transition, chromosome segregation, and  
13 nuclear division. Enriched pathways included, mitotic spindle checkpoint and DNA damage response  
14 while enriched human phenotypes were sloping forehead and decreased head circumference.  
15 Fructose-bisphosphatase 2 (*FBP2*) and Cell Division Cycle Associated 2 (*CDCA2*) genes were under-  
16 expressed in the B12 alone group. The latter, involved in chromosome segregation was under-  
17 expressed in both intervention groups. Based on the role of B-complex vitamins in the synthesis of  
18 nucleotides and S-Adenosyl Methionine, and the roles of vitamins A and D on gene expression, we  
19 propose that the multi-micronutrient intervention epigenetically affected cell cycle dynamics.  
20 Neonates in the B12+MMN group had the highest ponderal index. Follow up studies will reveal if the  
21 intervention and the altered biological processes influence offspring diabetes.

## 22 **Introduction**

23 The Developmental Origins of Health and Disease (DOHaD) paradigm proposes that the environment  
24 during crucial stages of development modifies gene expression through epigenetic influences which  
25 permanently affect the structure and function of the developing organism<sup>1</sup>. This phenomenon is also  
26 called 'fetal programming'<sup>2</sup>. This paradigm originated from Prof. David Barker's demonstration that  
27 low birth weight (indicative of poor fetal nutrition) was a risk factor for future diabetes and  
28 cardiovascular disease<sup>3</sup>. DOHaD theory proposes that improving fetal nutrition will help prevent  
29 common non-communicable diseases.

30 Fetal programming is largely an epigenetic phenomenon and depends on chemical modifications of  
31 DNA and histones or action of microRNAs, all of which influence gene expression<sup>4</sup>. DNA methylation  
32 is the most studied mechanism and is influenced by dietary nutrients which provide or generate  
33 methyl groups for cellular metabolism<sup>5, 6</sup>. These nutrients include vitamins B12, B2, B6, folate,  
34 choline, betaine, and proteins<sup>7</sup>. Vitamins A and D are also known to influence gene expression  
35 through their interaction with the nuclear receptors<sup>8, 9</sup>. Deficiency of these nutrients in the diet of a  
36 pregnant mother manifests in adverse effects on the fetus, including developmental defects (for  
37 example, neural tube defects), growth abnormalities (growth restriction)<sup>10</sup>, and are also associated  
38 with an increased risk of non-communicable diseases in later life<sup>11, 12</sup>.

39 The Pune Maternal Nutrition Study (PMNS) is a community based pre-conceptual birth cohort  
40 started in 1993 based on Prof. Barker's theory<sup>13</sup>. It was set up in six villages near Pune to study  
41 maternal nutritional determinants of fetal growth and to study life-course evolution of the risk of  
42 diabetes and related traits in the offspring. We found that two thirds of the pregnant mothers had

It is made available under a [CC-BY 4.0 International license](https://creativecommons.org/licenses/by/4.0/).

## Intergenerational effect of maternal intervention

1 low vitamin B12 status but folate status was adequate in the majority<sup>14</sup>. Lower maternal folate and  
2 higher total homocysteine concentrations were associated with lower offspring birth weight<sup>13, 15</sup>.  
3 Low maternal vitamin B12 and normal to high folate concentrations were associated with increased  
4 risk of diabetes (insulin resistance and adiposity), and low maternal vitamin D status with higher  
5 adiposity in the offspring<sup>14, 16</sup>. These findings prompted us to set up the Pune Rural Intervention in  
6 Young Adolescents (PRIYA) trial<sup>17</sup>. The trial provided vitamin B12 alone or along with other  
7 micronutrients (B-complex vitamins, vitamins A, D, and E, and trace elements) and milk proteins to  
8 the adolescent women in the PMNS cohort. The long-term aim of this intervention is to reduce  
9 diabetes and improve neurocognition in their offspring. In the short term, we aimed to investigate  
10 changes in DNA methylome, transcriptome, proteome, and metabolome in the cord blood of the  
11 newborn and its birth size. We have recently reported better neurocognitive outcomes in young  
12 offspring in the PRIYA trial whose mothers received vitamin B12 alone<sup>18</sup>.

13 The purpose of this paper is to describe the transcriptomic changes in the cord blood which may  
14 provide a mechanistic insight into micronutrient-mediated fetal programming, and possible  
15 pathways which may influence long-term outcomes in the offspring.

### 16 **Materials and Methods**

#### 17 **The PRIYA trial - Ethics permissions and trial registration**

18 PRIYA is a randomized, double blind, placebo-controlled trial in adolescent participants of the PMNS  
19 (Figure 1). The rationale and methods of the PRIYA trial are described previously<sup>17</sup>. The PRIYA trial  
20 was approved by the KEM Hospital Research Centre Ethics committee and monitored by a Data  
21 Safety Monitoring Board (DSMB) and a Scientific Advisory Committee (SAC). Informed consent was  
22 signed by parents of all participants, and an informed assent was signed by participants below 18  
23 years of age. After attaining 18 years of age, all participants signed their own informed consent. The  
24 trial was registered with the CTRI (2012/12/003212) and ISRCTN (32921044).

#### 25 **Participants**

26 Adolescent participants in the PMNS study were screened for vitamin B12 levels and hemoglobin  
27 concentrations. Those with severe vitamin B12 deficiency (plasma vitamin B12 concentration <100  
28 pmol/L) or severe anaemia (blood hemoglobin concentration <70 gm/L) were excluded from the trial  
29 and treated appropriately. This was to fulfil ethical imperatives of a placebo-controlled trial. Those  
30 with chronic medical conditions were also excluded.

#### 31 **Intervention and Comparator**

32 Eligible participants were randomised into 3 intervention groups: 1) vitamin B12 (2 µg/day) along  
33 with multi-micronutrients as per United Nations International Multiple Micronutrient Antenatal  
34 Preparation (UNIMMAP)<sup>19</sup>, excluding folic acid and conforming to local regulatory requirements  
35 (Supplementary Table 1), 2) Placebo, 3) vitamin B12 (2 µg/day) alone. The multi-micronutrient group  
36 also received 20 gm of milk powder every day and all 3 groups received iron and folic acid as per  
37 Government of India approved dosage (60 mg elemental iron + 500 µg folic acid once a week before  
38 pregnancy and one tablet daily for at least 100 days after diagnosis of pregnancy). Every month,  
39 bottles were distributed by local field staff who were in regular touch with the participants. Bottles

## Intergenerational effect of maternal intervention

1 were returned each month for counting the unused capsules, this information was used for  
2 calculating compliance. The trial intervention was continued until delivery of the first live child.

3 Habitual dietary intake was assessed using food frequency questionnaire (FFQ), developed and  
4 validated in the PMNS<sup>13</sup>.

### 5 **Outcomes**

6 A fasting blood sample was obtained for measurement of circulating micronutrients 6-12 months  
7 after the intervention was started. Marriages were recorded, and pregnancies were confirmed by a  
8 urine pregnancy test. At 28-weeks' gestation women visited KEM Hospital for an obstetric  
9 consultation and blood tests (hemogram, micronutrient levels and a fasting 75g oral glucose  
10 tolerance test). In the villages, women consulted local medical practitioners as required. The field  
11 staff visited and monitored pregnant women regularly and helped transfer them for delivery at the  
12 King Edward Memorial (KEM) Hospital, Pune.

13 Trained research staff attended all deliveries and collected maternal and cord blood samples as per a  
14 standardised protocol. An aliquot of cord blood was transferred to PAXgene tubes (BD, USA) and  
15 stored at -80°C till processed for extraction of RNA. Details of the delivery were recorded. Detailed  
16 anthropometric measurements were made within 24 hours of delivery by trained research staff  
17 using standardised methods (Supplementary Table 2). Gestational age was calculated from last  
18 menstrual period and confirmed by ultrasound measurements, if required.

### 19 **Blood measurements**

20 Maternal plasma vitamin B12, B6, holo-TC ('active' vitamin B12), folate, and total homocysteine  
21 concentrations were measured at screening, 6-12 months after starting intervention, at 28 weeks  
22 gestation, and at delivery. Similar measurements were made in the cord blood. Vitamin B2 was  
23 measured at all time-points except the screening. Supplementary Table 2 describes the laboratory  
24 methods used for these measurements.

### 25 **Statistical methods for clinical characteristics**

26 Maternal and neonatal clinical characteristics are shown as median (5<sup>th</sup>-95<sup>th</sup> centiles). The  
27 significance of difference between intervention and placebo groups was tested by Mann-Whitney  
28 test.

### 29 **Isolation of cord blood mononuclear cells**

30 Mononuclear cells from the cord blood were extracted after depleting RBCs from whole blood. In  
31 brief, batches of frozen blood samples were thawed and diluted with one volume of phosphate  
32 buffer saline supplemented with EDTA (2mM). One volume of RBC lysis buffer (Biolegend # 420301)  
33 was added to the diluted samples and incubated for 5 minutes at RT. The tubes were centrifuged at  
34 350 x g for 15 min at 4°C and the pellets were processed for RNA isolation.

### 35 **RNA isolation**

36 Cord blood mononuclear cells were subjected to RNA isolation using TriZol reagent (Invitrogen).  
37 Quantitation of RNA was performed on Qubit 4 Fluorometer (Thermo Scientific #Q33238) using RNA

It is made available under a [CC-BY 4.0 International license](https://creativecommons.org/licenses/by/4.0/).

## Intergenerational effect of maternal intervention

1 HS Kit (Thermo Scientific #Q32852). Libraries were prepared according to the manufacturer's  
2 protocol (Illumina). Briefly, each sample was run on 2100 Bioanalyzer (Agilent #G2939BA) to check  
3 its integrity. About 500 ng of total RNA from each sample was used to make libraries using TruSeq  
4 Stranded mRNA Sample Prep Kit (Illumina #20020594). After final quantification and pooling, the  
5 libraries were run on Illumina HiSeqX platform, with 150 nucleotides long paired end reads as the  
6 output.

### 7 RNA sequencing and data analysis

8 The quality of sequencing was assessed using FastQC (v0.11.8). The raw sequence reads were  
9 aligned to the human genome (hg38, GENCODE)<sup>20</sup> using HiSAT2<sup>21</sup>. The resulting BAM files were used  
10 to generate a count matrix using featureCounts for known genes<sup>22</sup>. Samples with reads that aligned  
11 poorly (Q1-IQR\*1.5) were excluded from the downstream analysis. Low expression genes (less than  
12 20 counts in total in all samples) were not included for the differential expression analysis. Gene  
13 expression levels were normalized by internal normalization method by calculating geometric mean  
14 in DESeq2<sup>23</sup>. Normalized expression values were regularized log transformed for PCA plots.  
15 Differential expression analysis was performed between the placebo group and the intervention  
16 groups by two-group comparison using the default Wald test in DESeq2. Maternal age at the start of  
17 intervention, duration of intervention, sex of the child, and cord blood monocyte, granulocyte, and  
18 lymphocyte counts were used as covariates. Absolute values of these covariates were converted to  
19 categorical variables around the median. Since the samples were processed in batches, the batch  
20 numbers were also used as a covariate. FDR adjusted P-value cut-off of 0.05 and base mean value  
21 cut-offs of 1 were used for identification of differentially expressed genes. Significantly differentially  
22 expressed genes were subjected to gene enrichment analysis using clusterProfiler (v3.14.3)<sup>24</sup> and  
23 gProfiler (version:e105\_eg52\_p16\_e84549f)<sup>25</sup>. To understand the gene-networking, the differentially  
24 expressed genes (DEGs), were subjected to gene network analysis using STRING<sup>26</sup>.

### 25 Results

#### 26 Trial progress and clinical findings

27 Six hundred and ninety adolescent participants in the PMNS (362 boys, 328 girls) were screened for  
28 inclusion in the PRIYA trial in the year 2012 (Figure 1). A total of 133 were excluded and 557 (266  
29 females, 291 males) were randomized into 3 groups. The intervention was started in September  
30 2012.

31 This paper refers to outcomes only in female participants. At screening they were ~16 years old, had  
32 a median body mass index (BMI) of 18.0 kg/m<sup>2</sup> (56.7% had a BMI <18.5 kg/m<sup>2</sup>, 30.1% were anemic  
33 (Hemoglobin <120 gm/L), and average education was 13 years of schooling. This is a predominantly  
34 vegetarian population: a third never ate non-vegetarian foods, and a fourth ate it less than once a  
35 week. Portion sizes of non-vegetarian foods were very small. Only 30% consumed milk more than  
36 alternate days. A total of 182 females married during the trial, 166 became pregnant, and 149  
37 delivered in the study. Cord blood samples were available on 138 for gene expression analysis. This  
38 paper reports transcriptome measurements on the first 88 cord blood samples (40 girls, 48 boys);  
39 these pregnancies were comparable to the 50 who are not included in this study [for maternal age,  
40 BMI, socio-economic status, and hemoglobin concentrations at 28 weeks gestation, p > 0.05].

It is made available under a [CC-BY 4.0 International license](https://creativecommons.org/licenses/by/4.0/).

## Intergenerational effect of maternal intervention

1 At 28 weeks gestation, the mothers were on average 21 years old and weighed 53.0 kgs with a BMI  
2 of 22.0 kg/m<sup>2</sup> (Table 1). The first delivery was in November 2014 and the last delivery was in  
3 February 2020. The duration of intervention was on an average of 54 months (min = 24, max = 83).  
4 Three mothers delivered pre-term, and 23 were delivered by caesarean section. The average birth  
5 weight of babies was 2.8 kg, 14 were low birth weight (<2.5 kg) (Table 2). There was no significant  
6 difference in the birth weight, length, skin fold thicknesses in the 3 groups; however, ponderal index  
7 was highest in the B12+MMN group. The pregnancy outcomes (pre-term deliveries, caesarean  
8 sections, and common adverse events) were similar in the three intervention groups.

9 At screening, plasma vitamin B12 concentrations were low and 47.7% were vitamin B12 deficient  
10 (<150 pmol/L), only 1% were folate deficient (<7 nmol/L). Plasma total homocysteine concentrations  
11 were high, 91% had hyperhomocysteinemia (>15 μmol/L). There was no significant difference in  
12 plasma vitamin B12, folate, and total homocysteine concentrations in the 3 intervention groups. In  
13 women, in the two vitamin B12 supplemented groups there was a sizeable rise in vitamin B12 and  
14 holo-TC concentrations compared to the placebo group, and a fall in total homocysteine  
15 concentrations within a few months (Figure 2A). The levels of vitamin B12 and total homocysteine  
16 fell during pregnancy (even in the placebo group), but both vitamin B12 and holo-TC remained  
17 higher in the two intervention groups. The difference in total homocysteine concentrations between  
18 groups was blunted in pregnancy. Vitamins B2 and B6 were the highest in the B12+MMN group at all  
19 time points after intervention (Table 1). Maternal hemoglobin concentrations were similar in the  
20 three groups throughout the trial. The measured compliance for consumption of intervention  
21 capsules was similar in the three intervention groups.

22 At delivery, compared to placebo, maternal vitamin B12 concentration was higher in the B12 alone  
23 group but not in the B12+MMN group. Holo-TC, folate and total homocysteine concentrations were  
24 similar in the three groups (Figure 2, Table 1). Vitamin B2 and B6 concentrations were highest in the  
25 mothers and in the cord blood of B12+MMN group. Maternal concentrations at delivery and cord  
26 blood concentrations of vitamin B12 (rho=0.716, p= <0.001), holo-TC (rho=0.668, p=<0.001), folate  
27 (rho=0.711, p=<0.001) and total homocysteine (rho=0.681, p=<0.001) were significantly correlated  
28 (Figure 2B). Cord blood hemoglobin concentration and red cell count were highest in the group  
29 supplemented with B12 alone. The total leucocyte count and individual counts of granulocytes,  
30 lymphocytes, monocytes, and platelets were similar in the 3 groups.

### 31 RNA sequencing and differential gene expression analysis:

32 Mononuclear cells from 88 cord blood samples were subjected to RNA sequencing. Each sample  
33 generated approximately 50 million reads. Out of the 88 samples, 9 samples showed poor alignment  
34 against the reference genome and were not considered for the downstream analysis. Our final  
35 analysis was therefore, on 79 samples. All samples showed comparable assignment to genes for  
36 generation of count matrix. The count matrix was used for differential expression analysis.

37 Samples showed clear separation based on the sex of the child on principal component analysis  
38 (PCA), however, no separation was observed based on any other covariate or the intervention  
39 (Figure 3A-3B). Differential expression analysis between the B12+MMN group and placebo resulted  
40 in identification of 75 differentially expressed genes (DEGs) (Figure 3C, Table 3, and Supplementary  
41 Table 3).

It is made available under a [CC-BY 4.0 International license](https://creativecommons.org/licenses/by/4.0/) .

## Intergenerational effect of maternal intervention

1 We used clusterProfiler and gProfiler to identify the top biological processes, pathways, and  
2 phenotypes affected by the DEGs (Figure 3D and Supplementary Figure 1). Participants  
3 supplemented with B12+MMN showed lower expression of genes associated with mitotic processes  
4 such as chromosome segregation, nuclear division, and G2/M phase transition as compared to the  
5 placebo group. To understand the gene-networking of the 75 DEGs, we performed analysis using  
6 STRING. Of the 75 DEGs, 71 formed a network with 12 showing association with the biological  
7 process ‘negative regulation of cell cycle’ (Figure 3E). Cell proliferation markers such as Cyclin D1  
8 (*CCND1*), *PCNA*, and Ki-67 (*MKI67*) did not show significant differences in gene expression; however,  
9 pathway analysis identified enrichment of Cell Cycle Checkpoints and DNA damage response  
10 pathways. Enrichment of human phenotype terms Sloping forehead and Decreased head  
11 circumference was also observed. The 75 genes differentially expressed between B12+MMN and  
12 placebo also showed similar trend in expression in the B12 alone group but did not reach statistical  
13 significance (Supplementary Table 3). The B12 alone group showed two differentially expressed  
14 genes [Fructose Bis-phosphatase 2 (*FBP2*) and Cell Division Cycle Associated 2 (*CDCA2*)] compared to  
15 placebo of which, *CDCA2* was common to the B12+MMN group (Figure 3F). No significantly  
16 differentially expressed genes were observed between the two active intervention groups.

## 17 Discussion

18 In this communication, we report the effect on the offspring’s cord blood transcriptome of a  
19 micronutrient intervention in mothers, started before conception (in adolescent age) and continued  
20 until the delivery of the child. The PRIYA trial is based in 6 villages near Pune and was guided by  
21 findings in the PMNS which showed: 1) a high prevalence of vitamin B12 deficiency in this  
22 predominantly vegetarian population<sup>13, 14</sup> 2) that higher maternal total homocysteine concentration  
23 during pregnancy was associated with lower offspring birth weight<sup>15</sup>, 3) that low maternal vitamin  
24 B12 and normal to high folate status in pregnancy was associated with increased risk of diabetes in  
25 the child<sup>14</sup>, and 4) that lower maternal vitamin B12 and folate nutrition was associated with poorer  
26 neurocognitive performance in the child<sup>27</sup>. In the PRIYA trial, we supplemented adolescent  
27 participants from the PMNS with either vitamin B12 alone or with multi-micronutrients and milk  
28 protein, or only placebo. The vitamin B12+MMN intervention resulted in differential expression of  
29 75 genes in the cord blood compared to the placebo group. Vitamin B12 alone influenced the  
30 expression of only a few genes, though the pattern of gene expression was similar in the two  
31 intervention groups. The differentially expressed genes in the B12+MMN group predominantly  
32 influenced mitosis related processes such as G2/M phase transition, chromosomal segregation, and  
33 nuclear division. B12 alone influenced transcription of *FBP2* and *CDCA2* genes of which *CDCA2* is  
34 common to B12+MMN group and involved in chromosomal segregation. To our knowledge, this is  
35 the first report of changes in the cord blood transcriptome after a maternal nutritional intervention  
36 initiated much prior to conception. Similar studies in the literature have mostly reported changes in  
37 DNA methylation in the cord blood but not gene expression. These include, response to maternal  
38 vitamin B12 supplementation<sup>28-32</sup> or folic acid supplementation<sup>33-38</sup>. Effects of maternal  
39 micronutrient supplements other than vitamin B12 and folate on DNA methylation in the offspring  
40 have also been reviewed<sup>39, 40</sup>.

41 Nutritional deficiencies were common in the participants of the PMNS as reflected in low BMI of  
42 mothers, relatively low intake of calories, proteins and micronutrients from a predominantly  
43 vegetarian diet, high prevalence of anemia, low levels of vitamin B12 and ferritin, and low birth

It is made available under a [CC-BY 4.0 International license](https://creativecommons.org/licenses/by/4.0/) .

## Intergenerational effect of maternal intervention

1 weight of the children<sup>13, 14</sup>. The villages were drought-prone, and the population had a low socio-  
2 economic status. Our intervention was prompted by our findings in this cohort which are  
3 summarized in the previous paragraph. In preparation for this intervention, we investigated and  
4 confirmed that absorption of a low dose oral vitamin B12 (2 mcg and 10 mcg) was adequate in this  
5 population, thus supporting the thesis that low vitamin B12 status was largely attributable to a low  
6 dietary intake<sup>41</sup>. We then performed a one-year pilot intervention to establish feasibility of a  
7 community-based trial and to decide on a dose of vitamin B12 which was physiological and effective  
8 in improving one carbon metabolism<sup>42</sup>. On this background, supplementation in the PRIYA trial  
9 achieved a demonstrable increase in circulating concentrations of vitamin B12, holo-TC, B2, and B6  
10 in the B12 + MMN group and of vitamin B12 and holo-TC in the B12 alone group during the pre-  
11 conceptional period. The difference from the placebo group persisted in pregnancy even though  
12 there was the expected physiological fall in the levels of vitamin B12 and holo-TC. Improved vitamin  
13 status resulted in an improvement in maternal one-carbon metabolism, seen in a significant fall in  
14 plasma total homocysteine concentrations. In the B12+MMN group, though not measured, we  
15 expect an additional improvement in nutrition of vitamins A, D, and E, and other micronutrients (Zn  
16 etc.) given the contents of the UNIMMAP capsules (Supplementary table 1). High folate  
17 concentrations in pregnancy are attributable to iron and folic acid supplementation in all 3 groups as  
18 per Government of India approved dosage (60 mg elemental iron and 500 µg folic acid daily), thus it  
19 was also seen in the placebo group. It is interesting that the concentrations of the vitamins were  
20 higher in the cord blood compared to the maternal blood, suggesting active placental transfer.  
21 Overall, our intervention translated into better micronutrient nutrition of the ovum before  
22 conception and of the conceptus throughout the pregnancy. A relative lack of difference in  
23 micronutrient concentrations between intervention and placebo groups in the cord blood may be  
24 contributed by altered placental transport, altered binding to carrier proteins, and differential  
25 utilisation by the baby<sup>43, 44</sup>.

26 An inspection of the one-carbon metabolic cycle (Figure 4) and its regulation by B-complex vitamins  
27 suggests that mothers and babies who received vitamin B12+MMN would have a more  
28 comprehensive effect on nucleotide synthesis, and DNA and RNA metabolism compared to those  
29 who received vitamin B12 alone. Higher hemoglobin and red blood cell count in the vitamin B12  
30 alone group may be related to higher levels of vitamin B12 and holo-TC in this group and their  
31 specific effect on haemopoietic tissue.

32 A detailed analysis of the transcriptomic differences suggested that though the overall pattern of  
33 differential expression was similar in the two intervention groups, the effect size was greater in the  
34 B12+MMN group. Thus, 75 genes were differentially expressed in the B12+MMN group but only two  
35 genes (*FBP2* and *CDCA2*) in the B12 alone group. Seventy-one of these 75 differentially expressed  
36 genes were closely networked and twelve of them showed a negative association with regulation of  
37 cell cycle. The affected biological processes included cell cycle G2/M phase transition, chromosome  
38 segregation, nuclear division and related. However, a targeted expression analysis of cell  
39 proliferation markers such as cyclin D1, Minichromosome Maintenance Complex Component 2  
40 (*MCM2*), Proliferating Cell Nuclear Antigen (*PCNA*) and Ki-67<sup>44</sup>, didn't show any significant difference  
41 in any of the intervention groups compared to the placebo group. Intriguingly, cell cycle checkpoint  
42 and DNA repair related genes showed higher expression in the placebo group.



It is made available under a [CC-BY 4.0 International license](https://creativecommons.org/licenses/by/4.0/).

## Intergenerational effect of maternal intervention

1 We propose that low concentrations of micronutrients in the placebo group resulted in  
2 hypomethylation of the relevant genes and consequently increased the expression of genes involved  
3 in nucleic acid synthesis and cell division. However, micronutrient deficiency compromised the  
4 supply of nucleotides for DNA synthesis and replication resulting in activation of cell cycle  
5 checkpoint. Thus, genes related to DNA synthesis and cell division appear relatively under-expressed  
6 in the B12+MMN group because the intervention led to better micronutrient status influencing  
7 methylation status of those relevant genes. Interestingly, in another study of vitamin B12 and/or  
8 folic acid supplementation in 9 year old children, we reported differential DNA methylation of genes  
9 associated with G2/M checkpoint regulation<sup>45</sup>. The MMN supplementation also included vitamins A  
10 and D, and zinc which are known to affect gene expression in specific tissues<sup>46-48</sup> and may have  
11 contributed to some of differentially expressed genes in the B12+MMN group. A review has  
12 summarized the recent exciting understanding of the role of core cellular metabolites (ATP, S-  
13 adenosyl methionine, acetyl-CoA, NAD/NADP and  $\alpha$ -ketoglutarate) in the nuclear compartment to  
14 influence the epigenome; all these metabolites are likely to be influenced in our intervention<sup>49</sup>.  
15 Association of transcriptomic changes with aspects of facial and head development is intriguing and  
16 it will be of interest to see if they reflect in any phenotypic features during follow up of the children,  
17 especially in the neurocognitive domain.

18 Features of vitamin B12 deficiency are usually described in relation to pernicious anaemia (a genetic-  
19 immunologic condition causing absence of 'intrinsic factor' which is essential for vitamin B12  
20 absorption). The biochemical and cellular changes include: block in deoxyuridine to thymidine  
21 conversion leading to disturbed DNA synthesis and repair, prolongation of S-phase, maturation  
22 arrest (G2/M transition) and failure of cell division<sup>50</sup>. There is a remarkable similarity in these  
23 disturbances and our findings. We could not find any reports of transcriptomic alterations in this  
24 condition. Two studies investigated the effect of cobalamin deficiency on nerve cells in culture: there  
25 was slower proliferation and accelerated differentiation of neuroblastoma cells<sup>51</sup> and impaired DNA  
26 synthesis, prolonged G2/M phase transition leading to cell growth without cell division in human  
27 astrocytes<sup>52</sup>. Again, no transcriptomic data was available.

28 **Strengths and Limitations:** A major strength of our intervention is that it was guided by past  
29 nutritional observations in the same cohort and that it was truly pre-conceptual (from adolescent  
30 age). Thus, our trial had the potential to influence peri-conceptual epigenetic reprogramming. Use  
31 of 'physiological' doses of micronutrients was based on the successful results of an absorption study  
32 and a pilot trial<sup>42</sup> which made it public health relevant. The limitations include that these preliminary  
33 results are on a relatively small number. The limited power could also have contributed to a lack of  
34 difference in the cord blood measurements of some of the micronutrients and in body size  
35 measurements of the babies in the three groups. Another limitation is that the transcriptomic  
36 measurements are limited only to cord blood mononuclear cells which may not reflect changes in  
37 other tissues and those earlier in the pregnancy. Such invasive studies are difficult in humans for  
38 ethical reasons. It should be noted that the transcriptome analysis using cord blood mononuclear  
39 cells acts as a surrogate to gain insights into the multitude of changes in the gene expression profiles  
40 resulted due to the in-utero programming following the nutritional intervention.

41 In conclusion, we provide the first evidence of the influence of human maternal pre-conceptual  
42 micronutrient intervention on the gene expression profile of the cord blood at delivery.  
43 Supplementation with vitamin B12 and other micronutrients influenced vital cellular processes such

## Intergenerational effect of maternal intervention

1 as cell cycle regulation, mitotic division, and growth of facial and head structures. These gene  
2 expression changes provide plausible mechanisms mediating intrauterine programming of future  
3 health and disease. In subsequent papers we intend to report the results of cord blood methylome,  
4 proteome, and metabolome and use a systems approach to allow a better understanding of the full  
5 range of 'OMIC' changes in response to micronutrient intervention. Follow up studies in children will  
6 provide an opportunity to investigate the association of these alterations with outcomes of body size  
7 and composition, metabolism, and neurocognitive function.

### 8 **Data availability**

9 The datasets generated for this study can be found in NCBI SRA: PRJNA756634.

### 10 **Funding**

11 The work was supported by research grant titled "Centre of Excellence in Fetal Programming" from  
12 Department of Biotechnology (DBT), Government of India (CEIB-BT/PR12629/MED/97/364/2016)  
13 and Indian Council of Medical Research (ICMR) – Medical Research Council (MRC), UK grant  
14 (No.58/1/8/ICMR-MRC/2009-NCD-II).

### 15 **Acknowledgements**

16 Ayush Madhok, Indumathi Patta, and Vipul V. Wagh thank CSIR-UGC, Government of India for  
17 research fellowships. Satyajeet P. Khare is a beneficiary of the DST SERB SRG grant  
18 (SRG/2020/001414). The authors thank Drs Ameya Sathe, Ankitha Shetty for their help in processing  
19 cord blood samples, Saurabh Pradhan for help with RNA-seq, Neelam Memane and Rajashree Kamat  
20 for laboratory assays, Aboli Bhalerao and Madhura Deshmukh, field staff for their help in the PRIYA  
21 study, Mrs. Pallavi Yajnik and Rasika Ladkat for administrative help.

### 22 **Author contributions**

23 Chittaranjan S. Yajnik and Caroline Fall designed the PRIYA trial. Kalyanaraman Kumaran contributed  
24 to running the trial. Indumathi Patta assisted in optimization of cell isolation and RNA preparation.  
25 Satyajeet P. Khare and Ayush Madhok performed RNA sequencing and analysis, Satyajeet P. Khare  
26 wrote the manuscript. Krishna K. Sukla, Vipul Wagh, and Pooja S. Kunte helped in data analysis and  
27 drafting the manuscript. Giriraj R. Chandak and Utpal Tatu contributed to the discussion and  
28 interpretations. Deepa Raut and Dattatray Bhat assisted in sample collection. Sanjeev Galande  
29 designed the experiments. Chittaranjan S. Yajnik and Sanjeev Galande discussed and interpreted the  
30 results, supported the research, and wrote the manuscript. All authors read and approved the  
31 manuscript.

### 32 **Conflict of interest**

33 The authors have declared no competing interest.

34

1 **References:**

- 2 1. Heindel JJ, Vandenberg LN. Developmental origins of health and disease: a paradigm for  
3 understanding disease cause and prevention. *Curr Opin Pediatr*. 2015;27(2), 248-253.
- 4 2. Lucas A, Fewtrell MS, Cole TJ. Fetal origins of adult disease-the hypothesis revisited. *BMJ*.  
5 1999;319(7204), 245-249.
- 6 3. Barker DJ, Winter PD, Osmond C, Margetts B, Simmonds SJ. Weight in infancy and death  
7 from ischaemic heart disease. *Lancet*. 1989;2(8663), 577-580.
- 8 4. Gluckman PD, Hanson MA, Cooper C, Thornburg KL. Effect of in utero and early-life  
9 conditions on adult health and disease. *N Engl J Med*. 2008;359(1), 61-73.
- 10 5. Kok DE, Dhonukshe-Rutten RA, Lute C, et al. The effects of long-term daily folic acid and  
11 vitamin B12 supplementation on genome-wide DNA methylation in elderly subjects. *Clin*  
12 *Epigenetics*. 2015;7, 121.
- 13 6. Switzeny OJ, Mullner E, Wagner KH, Brath H, Aumuller E, Haslberger AG. Vitamin and  
14 antioxidant rich diet increases MLH1 promoter DNA methylation in DMT2 subjects. *Clin*  
15 *Epigenetics*. 2012;4(1), 19.
- 16 7. Zeisel S. Choline, Other Methyl-Donors and Epigenetics. *Nutrients*. 2017;9(5).
- 17 8. Berry DC, Jin H, Majumdar A, Noy N. Signaling by vitamin A and retinol-binding protein  
18 regulates gene expression to inhibit insulin responses. *Proc Natl Acad Sci U S A*.  
19 2011;108(11), 4340-4345.
- 20 9. Pasing Y, Fenton CG, Jorde R, Paulssen RH. Changes in the human transcriptome upon  
21 vitamin D supplementation. *J Steroid Biochem Mol Biol*. 2017;173, 93-99.
- 22 10. Gernand AD, Schulze KJ, Stewart CP, West KP, Jr., Christian P. Micronutrient deficiencies in  
23 pregnancy worldwide: health effects and prevention. *Nat Rev Endocrinol*. 2016;12(5), 274-  
24 289.

It is made available under a [CC-BY 4.0 International license](https://creativecommons.org/licenses/by/4.0/) .

### Intergenerational effect of maternal intervention

- 1 11. Deshmukh U, Katre P, Yajnik CS. Influence of maternal vitamin B12 and folate on growth and  
2 insulin resistance in the offspring. *Nestle Nutr Inst Workshop Ser.* 2013;74, 145-154;  
3 discussion 154-146.
- 4 12. Pandit P, Galande S, Iris F. Maternal malnutrition and anaemia in India: dysregulations  
5 leading to the 'thin-fat' phenotype in newborns. *J Nutr Sci.* 2021;10, e91.
- 6 13. Rao S, Kanade A, Margetts BM, et al. Maternal activity in relation to birth size in rural India.  
7 The Pune Maternal Nutrition Study. *Eur J Clin Nutr.* 2003;57(4), 531-542.
- 8 14. Yajnik CS, Deshpande SS, Jackson AA, et al. Vitamin B12 and folate concentrations during  
9 pregnancy and insulin resistance in the offspring: the Pune Maternal Nutrition Study.  
10 *Diabetologia.* 2008;51(1), 29-38.
- 11 15. Yajnik CS, Chandak GR, Joglekar C, et al. Maternal homocysteine in pregnancy and offspring  
12 birthweight: epidemiological associations and Mendelian randomization analysis. *Int J*  
13 *Epidemiol.* 2014;43(5), 1487-1497.
- 14 16. Wagh RH, Bawdekar RU, Alenaini W, et al. Maternal Micronutrient Status in Pregnancy is  
15 Associated with Child's Adiposity at 18yrs of Age. *Journal of Developmental Origins of Health*  
16 *and Disease.* 2019;10, S284.
- 17 17. Kumaran K, Yajnik P, Lubree H, et al. The Pune Rural Intervention in Young Adolescents  
18 (PRIYA) study: design and methods of a randomised controlled trial. *BMC Nutr.* 2017;3, 41.
- 19 18. D'Souza N, Behere RV, Patni B, et al. Pre-conceptional Maternal Vitamin B12  
20 Supplementation Improves Offspring Neurodevelopment at 2 Years of Age: PRIYA Trial. *Front*  
21 *Pediatr.* 2021;9, 755977.
- 22 19. World-Health-Organization. Composition of a multi-micronutrient supplement to be used in  
23 pilot programmes among pregnant women in developing countries: report of a United  
24 Nations Children's Fund (UNICEF), World Health Organization (WHO) and United Nations  
25 University workshop. 1999.

It is made available under a [CC-BY 4.0 International license](https://creativecommons.org/licenses/by/4.0/).

### Intergenerational effect of maternal intervention

- 1 20. Frankish A, Diekhans M, Ferreira AM, et al. GENCODE reference annotation for the human  
2 and mouse genomes. *Nucleic Acids Res.* 2019;47(D1), D766-D773.
- 3 21. Kim D, Paggi JM, Park C, Bennett C, Salzberg SL. Graph-based genome alignment and  
4 genotyping with HISAT2 and HISAT-genotype. *Nat Biotechnol.* 2019;37(8), 907-915.
- 5 22. Liao Y, Smyth GK, Shi W. featureCounts: an efficient general purpose program for assigning  
6 sequence reads to genomic features. *Bioinformatics.* 2014;30(7), 923-930.
- 7 23. Love MI, Huber W, Anders S. Moderated estimation of fold change and dispersion for RNA-  
8 seq data with DESeq2. *Genome Biol.* 2014;15(12), 550.
- 9 24. Yu G, Wang LG, Han Y, He QY. clusterProfiler: an R package for comparing biological themes  
10 among gene clusters. *OMICS.* 2012;16(5), 284-287.
- 11 25. Raudvere U, Kolberg L, Kuzmin I, et al. g:Profiler: a web server for functional enrichment  
12 analysis and conversions of gene lists (2019 update). *Nucleic Acids Res.* 2019;47(W1), W191-  
13 W198.
- 14 26. Szklarczyk D, Gable AL, Lyon D, et al. STRING v11: protein-protein association networks with  
15 increased coverage, supporting functional discovery in genome-wide experimental datasets.  
16 *Nucleic Acids Res.* 2019;47(D1), D607-D613.
- 17 27. Bhate V, Deshpande S, Bhat D, et al. Vitamin B12 status of pregnant Indian women and  
18 cognitive function in their 9-year-old children. *Food Nutr Bull.* 2008;29(4), 249-254.
- 19 28. Cooper WN, Khulan B, Owens S, et al. DNA methylation profiling at imprinted loci after  
20 periconceptional micronutrient supplementation in humans: results of a pilot randomized  
21 controlled trial. *FASEB J.* 2012;26(5), 1782-1790.
- 22 29. Fryer AA, Emes RD, Ismail KM, et al. Quantitative, high-resolution epigenetic profiling of CpG  
23 loci identifies associations with cord blood plasma homocysteine and birth weight in  
24 humans. *Epigenetics.* 2011;6(1), 86-94.

### Intergenerational effect of maternal intervention

- 1 30. Khulan B, Cooper WN, Skinner BM, et al. Periconceptional maternal micronutrient  
2 supplementation is associated with widespread gender related changes in the epigenome: a  
3 study of a unique resource in the Gambia. *Hum Mol Genet.* 2012;21(9), 2086-2101.
- 4 31. McKay JA, Groom A, Potter C, et al. Genetic and non-genetic influences during pregnancy on  
5 infant global and site specific DNA methylation: role for folate gene variants and vitamin  
6 B12. *PLoS One.* 2012;7(3), e33290.
- 7 32. McCullough LE, Miller EE, Mendez MA, Murtha AP, Murphy SK, Hoyo C. Maternal B vitamins:  
8 effects on offspring weight and DNA methylation at genomically imprinted domains. *Clin*  
9 *Epigenetics.* 2016;8, 8.
- 10 33. Caffrey A, Irwin RE, McNulty H, et al. Gene-specific DNA methylation in newborns in  
11 response to folic acid supplementation during the second and third trimesters of pregnancy:  
12 epigenetic analysis from a randomized controlled trial. *Am J Clin Nutr.* 2018;107(4), 566-575.
- 13 34. Hoyo C, Murtha AP, Schildkraut JM, et al. Methylation variation at IGF2 differentially  
14 methylated regions and maternal folic acid use before and during pregnancy. *Epigenetics.*  
15 2011;6(7), 928-936.
- 16 35. Qian YY, Huang XL, Liang H, et al. Effects of maternal folic acid supplementation on gene  
17 methylation and being small for gestational age. *J Hum Nutr Diet.* 2016;29(5), 643-651.
- 18 36. Pauwels S, Ghosh M, Duca RC, et al. Dietary and supplemental maternal methyl-group donor  
19 intake and cord blood DNA methylation. *Epigenetics.* 2017;12(1), 1-10.
- 20 37. Tserga A, Binder AM, Michels KB. Impact of folic acid intake during pregnancy on genomic  
21 imprinting of IGF2/H19 and 1-carbon metabolism. *FASEB J.* 2017;31(12), 5149-5158.
- 22 38. Irwin RE, Thursby SJ, Ondicova M, et al. A randomized controlled trial of folic acid  
23 intervention in pregnancy highlights a putative methylation-regulated control element at  
24 ZFP57. *Clin Epigenetics.* 2019;11(1), 31.

It is made available under a [CC-BY 4.0 International license](https://creativecommons.org/licenses/by/4.0/).

### Intergenerational effect of maternal intervention

- 1 39. Andraos S, de Seymour JV, O'Sullivan JM, Kussmann M. The Impact of Nutritional  
2 Interventions in Pregnant Women on DNA Methylation Patterns of the Offspring: A  
3 Systematic Review. *Mol Nutr Food Res*. 2018;62(24), e1800034.
- 4 40. James P, Sajjadi S, Tomar AS, et al. Candidate genes linking maternal nutrient exposure to  
5 offspring health via DNA methylation: a review of existing evidence in humans with specific  
6 focus on one-carbon metabolism. *Int J Epidemiol*. 2018;47(6), 1910-1937.
- 7 41. Bhat DS, Thuse NV, Lubree HG, et al. Increases in plasma holotranscobalamin can be used to  
8 assess vitamin B-12 absorption in individuals with low plasma vitamin B-12. *J Nutr*.  
9 2009;139(11), 2119-2123.
- 10 42. Deshmukh US, Joglekar CV, Lubree HG, et al. Effect of physiological doses of oral vitamin B12  
11 on plasma homocysteine: a randomized, placebo-controlled, double-blind trial in India. *Eur J*  
12 *Clin Nutr*. 2010;64(5), 495-502.
- 13 43. Lager S, Powell TL. Regulation of nutrient transport across the placenta. *J Pregnancy*.  
14 2012;2012, 179827.
- 15 44. Whitfield ML, George LK, Grant GD, Perou CM. Common markers of proliferation. *Nat Rev*  
16 *Cancer*. 2006;6(2), 99-106.
- 17 45. Yadav DK, Shrestha S, Lillycrop KA, et al. Vitamin B(12) supplementation influences  
18 methylation of genes associated with Type 2 diabetes and its intermediate traits.  
19 *Epigenomics*. 2018;10(1), 71-90.
- 20 46. Blomhoff HK. Vitamin A regulates proliferation and apoptosis of human T- and B-cells.  
21 *Biochem Soc Trans*. 2004;32(Pt 6), 982-984.
- 22 47. MacDonald RS. The role of zinc in growth and cell proliferation. *J Nutr*. 2000;130(5S Suppl),  
23 1500S-1508S.
- 24 48. Umar M, Sastry KS, Chouchane AI. Role of Vitamin D Beyond the Skeletal Function: A Review  
25 of the Molecular and Clinical Studies. *Int J Mol Sci*. 2018;19(6).

It is made available under a [CC-BY 4.0 International license](https://creativecommons.org/licenses/by/4.0/) .

### Intergenerational effect of maternal intervention

- 1 49. Boon R, Silveira GG, Mostoslavsky R. Nuclear metabolism and the regulation of the  
2 epigenome. *Nat Metab.* 2020;2(11), 1190-1203.
- 3 50. Antony A. Megaloblastic Anemias. In *Hematology: Basic Principles and Practice.* (ed.  
4 Hoffman RB, E.; Heslop, H.; Weitz, J.), 2017. Elsevier.
- 5 51. Battaglia-Hsu SF, Akchiche N, Noel N, et al. Vitamin B12 deficiency reduces proliferation and  
6 promotes differentiation of neuroblastoma cells and up-regulates PP2A, proNGF, and TACE.  
7 *Proc Natl Acad Sci U S A.* 2009;106(51), 21930-21935.
- 8 52. Rzepka Z, Rok J, Respondek M, et al. Cobalamin Deficiency: Effect on Homeostasis of  
9 Cultured Human Astrocytes. *Cells.* 2019;8(12).
- 10 53. Lyon P, Strippoli V, Fang B, Cimmino L. B Vitamins and One-Carbon Metabolism: Implications  
11 in Human Health and Disease. *Nutrients.* 2020;12(9).

12

13



1 **Figure legends**

2 **Figure 1: The Pune Maternal Nutrition Study (PMNS) and the Pune Rural Intervention in Young**  
3 **Adolescents (PRIYA) trial.** A) Broad plan of the study. B) CONSORT diagram of the PRIYA trial.

4 **Figure 2: Serial micronutrient levels in the mothers and baby's cord blood in the PRIYA trial.** A)  
5 Median concentrations of vitamin B12 (pmol/L), Holo-TC (pmol/L), folate (nmol/L), and total  
6 homocysteine ( $\mu\text{mol/L}$ ) at screening, post-intervention (~6-12 months later), 28 weeks gestation and  
7 at delivery in the mothers. B) Concentrations in the mother at delivery and in the cord blood of the  
8 baby are joined for the individual pairs. Concentrations of vitamin B12, holo-TC and folate were  
9 higher and those of total homocysteine lower in the cord blood compared to maternal concentrations  
10 at delivery. There was a highly significant association between maternal and cord blood  
11 concentrations of these four measurements ( $\rho \sim 0.7$ ,  $p < 0.001$ ). \*  $p < 0.05$ , \*\*  $p < 0.01$ , \*\*\*  $p < 0.001$   
12 denotes significance of difference from the placebo; MMN, multiple micronutrients.

13 **Figure 3: Gene enrichment analysis of genes differentially expressed between B12+MMN group**  
14 **and placebo.** PCA plot highlighting A) intervention groups and B) sex of the child. C) Volcano plot for  
15 differential expression analysis. D) Gene enrichment and C) Network analysis of 75 differentially  
16 expressed genes highlighting negative regulators of cell cycle. D) Expression plot for CDCA2 in the  
17 three intervention groups (\* adj P-value  $< 0.05$ ); MMN, multiple micronutrients.

18 **Figure 4: One-Carbon Metabolism and PRIYA trial.** A) One carbon metabolism is a central metabolic  
19 pathway combining folate cycle and methionine cycle. Folate cycle generates nucleotides which help  
20 DNA synthesis and repair while methionine cycle generates methionine and S-adenosyl methionine  
21 (SAM). Methionine is a component of all cellular proteins and SAM methylates a wide range of  
22 cellular molecules including DNA (an epigenetic mechanism), lipids (important in nervous system),  
23 and proteins. Folate cycle is influenced by a number of B complex vitamins (B2, B6, B9 and B12) as is  
24 the methionine cycle (B6, B12). Dietary proteins provide the amino acid serine which is the primary  
25 donor of methyl groups, and other amino acids which get incorporated in protein molecules. B)  
26 Vitamin B12 has an additional influence on mitochondrial energy metabolism through its action as a  
27 cofactor to mutase enzyme which converts methylmalonic acid to succinic acid (Adapted from Lyon  
28 et al., 2020<sup>53</sup>).

It is made available under a [CC-BY 4.0 International license](https://creativecommons.org/licenses/by/4.0/).

**Intergenerational effect of maternal intervention**

1 **Table 1:** Comparison of maternal characteristics between study participants of 3 intervention groups

|                                             | <b>B12+MMN group:<br/>Median (5th, 95th<br/>centiles) (N=29, 15<br/>boys, 14 girls)</b> | <b>Placebo group:<br/>Median (5th,<br/>95th centiles)<br/>(N=29, 17 boys,<br/>12 girls)</b> | <b>B12 alone<br/>group: Median<br/>(5th, 95th<br/>centiles) (N=30,<br/>16 boys, 14<br/>girls)</b> | <b>P-<br/>value<br/>(B12+<br/>MMN<br/>Vs<br/>Placeb<br/>o)<br/>(Mann-<br/>Whitn<br/>ey U p-<br/>value)</b> | <b>P-<br/>value<br/>(Placeb<br/>o Vs<br/>B12<br/>alone)<br/>(Mann-<br/>Whitne<br/>y U p-<br/>value)</b> | <b>P-<br/>value<br/>(B12<br/>+MM<br/>N Vs<br/>B12<br/>alone<br/>)<br/>(Man<br/>n-<br/>Whit<br/>ney<br/>U p-<br/>value<br/>)</b> |
|---------------------------------------------|-----------------------------------------------------------------------------------------|---------------------------------------------------------------------------------------------|---------------------------------------------------------------------------------------------------|------------------------------------------------------------------------------------------------------------|---------------------------------------------------------------------------------------------------------|---------------------------------------------------------------------------------------------------------------------------------|
| <b>Screening</b>                            |                                                                                         |                                                                                             |                                                                                                   |                                                                                                            |                                                                                                         |                                                                                                                                 |
| <b>Age (Years)</b>                          | 15.9 (15.6, 17.0)                                                                       | 16.5 (15.6, 16.9)                                                                           | 16.2 (15.6, 16.9)                                                                                 | 0.099                                                                                                      | 0.200                                                                                                   | 0.802                                                                                                                           |
| <b>Hemoglobin<br/>(gm/L)</b>                | 128 (109, 145)                                                                          | 127 (102, 149)                                                                              | 127 (105, 142)                                                                                    | 0.474                                                                                                      | 0.738                                                                                                   | 0.268                                                                                                                           |
| <b>Vitamin B12<br/>(pmol/L)</b>             | 160.0 (108.0,<br>273.0)                                                                 | 147.0 (104.4,<br>238.0)                                                                     | 148.5 (106.0,<br>272.1)                                                                           | 0.131                                                                                                      | 0.439                                                                                                   | 0.544                                                                                                                           |
| <b>Holo-TC (pmol/L)</b>                     | 13.0 (6.5, 22.1)                                                                        | 10.1 (5.0, 23.1)                                                                            | 10.2 (5.1, 31.9)                                                                                  | 0.096                                                                                                      | 0.934                                                                                                   | 0.145                                                                                                                           |
| <b>Folate (nmol/L)</b>                      | 15.5 (8.9, 35.7)                                                                        | 21.7 (13.3, 46.2)                                                                           | 17.0 (9.4, 39.3)                                                                                  | <b>0.029</b>                                                                                               | 0.117                                                                                                   | 0.471                                                                                                                           |
| <b>Total<br/>Homocysteine<br/>(µmol /L)</b> | 21.0 (13.9, 54.5)                                                                       | 24.2 (13.5, 46.1)                                                                           | 22.8 (12.2, 39.1)                                                                                 | 0.539                                                                                                      | 0.328                                                                                                   | 0.897                                                                                                                           |
| <b>Post-intervention (Interim)</b>          |                                                                                         |                                                                                             |                                                                                                   |                                                                                                            |                                                                                                         |                                                                                                                                 |
| <b>Age (Years)</b>                          | 17.3 (16.8, 18.2)                                                                       | 17.7 (16.8, 18.7)                                                                           | 17.5 (16.8, 18.1)                                                                                 | 0.184                                                                                                      | 0.278                                                                                                   | 0.856                                                                                                                           |
| <b>Hemoglobin<br/>(gm/L)</b>                | 120 (106, 133)                                                                          | 120 (99, 136)                                                                               | 117 (91, 130)                                                                                     | 1.000                                                                                                      | 0.219                                                                                                   | 0.179                                                                                                                           |
| <b>Vitamin B12<br/>(pmol/L)</b>             | 262.0 (108.9,<br>483.4)                                                                 | 161.9 (107.0,<br>279.6)                                                                     | 272.5 (165.1,<br>549.5)                                                                           | <b>0.000</b>                                                                                               | <b>0.000</b>                                                                                            | 0.246                                                                                                                           |
| <b>Holo-TC (pmol/L)</b>                     | 23.6 (7.2, 55.9)                                                                        | 8.9 (5.0, 32.4)                                                                             | 28.8 (6.4, 81.3)                                                                                  | <b>0.000</b>                                                                                               | <b>0.000</b>                                                                                            | 0.295                                                                                                                           |
| <b>Folate (nmol/L)</b>                      | 19.4 (13.5, 38.8)                                                                       | 24.9 (14.6, 69.4)                                                                           | 23.0 (13.0, 55.0)                                                                                 | <b>0.030</b>                                                                                               | 0.222                                                                                                   | 0.375                                                                                                                           |
| <b>Total<br/>Homocysteine<br/>(µmol /L)</b> | 10.0 (6.7, 24.1)                                                                        | 24.3 (9.9, 49.4)                                                                            | 10.6 (7.6, 19.0)                                                                                  | <b>0.000</b>                                                                                               | <b>0.000</b>                                                                                            | 0.850                                                                                                                           |
| <b>28 weeks gestation</b>                   |                                                                                         |                                                                                             |                                                                                                   |                                                                                                            |                                                                                                         |                                                                                                                                 |
| <b>Age (Years)</b>                          | 21.2 (18.9, 23.9)                                                                       | 21.3 (19.5, 22.9)                                                                           | 21.1 (19.1, 23)                                                                                   | 0.578                                                                                                      | 0.773                                                                                                   | 0.781                                                                                                                           |
| <b>BMI (kg/m<sup>2</sup>)</b>               | 21.5 (19.1, 27.7)                                                                       | 21.7 (17.4, 31.8)                                                                           | 20.8 (17.8, 26.7)                                                                                 | 0.975                                                                                                      | 0.176                                                                                                   | 0.080                                                                                                                           |
| <b>Hemoglobin<br/>(gm/L)</b>                | 104 (82, 123)                                                                           | 106 (89, 128)                                                                               | 104 (75, 121)                                                                                     | 0.635                                                                                                      | 0.595                                                                                                   | 0.946                                                                                                                           |
| <b>Vitamin B12<br/>(pmol/L)</b>             | 202.0 (117.8,<br>606.0)                                                                 | 153.0 (87.0,<br>424.6)                                                                      | 216.5 (127.1,<br>506.3)                                                                           | <b>0.015</b>                                                                                               | <b>0.002</b>                                                                                            | 0.135                                                                                                                           |
| <b>Holo-TC (pmol/L)</b>                     | 29.4 (11.3, 125.0)                                                                      | 16.6 (7.1, 115.4)                                                                           | 35.3 (10.8,<br>128.0)                                                                             | <b>0.009</b>                                                                                               | <b>0.005</b>                                                                                            | 0.606                                                                                                                           |
| <b>Folate (nmol/L)</b>                      | 42.1 (7.9, 73.9)                                                                        | 45.6 (10.7, 72.6)                                                                           | 48.3 (9.5, 76.7)                                                                                  | 0.497                                                                                                      | 0.85                                                                                                    | 0.655                                                                                                                           |
| <b>Vitamin B2<br/>(pmol/L)</b>              | 240.0 (171.2,<br>321.8)                                                                 | 226.0 (164.0,<br>281.0)                                                                     | 224.0 (156.2,<br>283.4)                                                                           | 0.351                                                                                                      | 0.586                                                                                                   | 0.202                                                                                                                           |

It is made available under a [CC-BY 4.0 International license](https://creativecommons.org/licenses/by/4.0/).

### Intergenerational effect of maternal intervention

|                                   |                      |                     |                      |              |              |              |
|-----------------------------------|----------------------|---------------------|----------------------|--------------|--------------|--------------|
| Vitamin B6 (plp) (µg/ml)          | 4.9 (3.2, 23.6)      | 3.6 (1.9, 11.5)     | 3.2 (2.3, 7.3)       | <b>0.010</b> | 0.720        | <b>0.000</b> |
| Vitamin B6 (pyx) (µg/ml)          | 1.6 (0.8, 3.6)       | 1.2 (0.6, 3.4)      | 1.2 (0.8, 2.1)       | 0.127        | 0.913        | <b>0.042</b> |
| Total Homocysteine (µmol/L)       | 6.6 (3.4, 9.1)       | 6.6 (2.2, 14.9)     | 6.2 (3.2, 10.8)      | 0.339        | 0.252        | 0.952        |
| <b>At delivery</b>                |                      |                     |                      |              |              |              |
| Duration of intervention (months) | 54.0 (26.4, 78.0)    | 53.0 (29.6, 77.4)   | 57.5 (29.5, 77.2)    | 0.864        | 0.773        | 0.879        |
| Compliance (%)                    | 88.8 (66.5, 100.4)   | 90.8 (67.5, 102.4)  | 88.9 (68.1, 100.1)   | 0.524        | 0.617        | 0.922        |
| Vitamin B12 (pmol/L)              | 189.0 (101.2, 504.8) | 180.0 (70.6, 376.8) | 240.0 (107.2, 448.0) | 0.465        | <b>0.033</b> | 0.135        |
| Holo-TC (pmol/L)                  | 28.1 (7.8, 111.5)    | 24.6 (9.0, 86.0)    | 31.2 (10.6, 128.0)   | 0.312        | 0.075        | 0.359        |
| Folate (nmol/L)                   | 30.1 (13.3, 77.2)    | 43.5 (5.9, 91.3)    | 33.6 (10.3, 88.5)    | 0.576        | 0.805        | 0.988        |
| Total Homocysteine (µmol/L)       | 7.8 (3.1, 16.3)      | 8.9 (4.8, 16.2)     | 8.6 (3.5, 13.8)      | 0.307        | 0.324        | 0.852        |

- 1 **Note:** IQR: Inter Quartile Range, plp: pyridoxal 5 $\beta$ -phosphate, pyx: pyridoxine; values represent
- 2 median (IQR); P-values for between group comparison calculated by Mann-Whitney U test and for
- 3 multi-group comparison by Kruskal Wallis test. P - Value is calculated by KRUSKAL WALLIS.

**Table 2:** Comparison of neonatal characteristics between study participants of 3 intervention groups

|                                                    | <b>B12+MMN group: Median (5th, 95th centiles) (N=29, 15 boys, 14 girls)</b> | <b>Placebo group: Median (5th, 95th centiles) (N=29, 17 boys, 12 girls)</b> | <b>B12 alone group: Median (5th, 95th centiles) (N=30, 16 boys, 14 girls)</b> | <b>P-value (B12+ MMN Vs Placebo)</b> | <b>P-value (Placebo Vs B12 alone)</b> | <b>P-value (B12+MMN Vs B12 alone)</b> |
|----------------------------------------------------|-----------------------------------------------------------------------------|-----------------------------------------------------------------------------|-------------------------------------------------------------------------------|--------------------------------------|---------------------------------------|---------------------------------------|
| <b>Anthropometry</b>                               |                                                                             |                                                                             |                                                                               |                                      |                                       |                                       |
| <b>Birth weight (gms)</b>                          | 2951.0 (2151.0, 3560.0)                                                     | 2760.0 (2276.0, 3584.0)                                                     | 2778.0 (1790.0, 3323.5)                                                       | 0.305                                | 0.601                                 | 0.083                                 |
| <b>Birth length (cm)</b>                           | 48.2 (43.9, 52.0)                                                           | 48.4 (45.6, 50.5)                                                           | 48.5 (44.8, 51.1)                                                             | 0.597                                | 0.426                                 | 0.850                                 |
| <b>Ponderal Index (g/cm<sup>3</sup>)</b>           | 2.6 (2.2, 2.9)                                                              | 2.4 (2.2, 3.0)                                                              | 2.4 (2.1, 2.7)                                                                | <b>0.044</b>                         | 0.791                                 | <b>0.017</b>                          |
| <b>Adiposity (sum of skinfolds) (mm)</b>           | 8.2 (6.2, 10.9)                                                             | 8.4 (6.1, 13.0)                                                             | 7.8 (6.0, 11.0)                                                               | 0.926                                | 0.481                                 | 0.490                                 |
| <b>Cord blood biochemistry</b>                     |                                                                             |                                                                             |                                                                               |                                      |                                       |                                       |
| <b>Vitamin B12 (pmol/L)</b>                        | 292.0 (121.4, 1562.0)                                                       | 282.0 (118.8, 979.6)                                                        | 380.5 (94.0, 1752.9)                                                          | 0.858                                | 0.108                                 | 0.154                                 |
| <b>Holo-TC (pmol/L)</b>                            | 94.7 (15.9, 128.0)                                                          | 61.3 (23.0, 128.0)                                                          | 121.7 (24.3, 128.0)                                                           | 0.634                                | 0.164                                 | 0.301                                 |
| <b>Folate (nmol/L)</b>                             | 47.6 (25.3, 79.0)                                                           | 56.9 (22.2, 104.8)                                                          | 55.5 (19.5, 88.5)                                                             | 0.413                                | 0.671                                 | 0.562                                 |
| <b>Vitamin B2 (pmol/L)</b>                         | 321.0 (214.6, 444.2)                                                        | 289.0 (222.2, 384.8)                                                        | 304.0 (227.9, 410.0)                                                          | 0.401                                | 0.476                                 | 0.909                                 |
| <b>Vitamin B6 (plp) (µg/ml)</b>                    | 32.3 (16.3, 73.9)                                                           | 23.4 (5.2, 46.7)                                                            | 23.5 (7.9, 61.6)                                                              | <b>0.034</b>                         | 0.622                                 | 0.059                                 |
| <b>Vitamin B6 (pyx) (µg/ml)</b>                    | 5.2 (3.4, 14.5)                                                             | 4.1 (2.6, 7.4)                                                              | 4.8 (2.7, 9.4)                                                                | <b>0.014</b>                         | 0.154                                 | 0.271                                 |
| <b>Total Homocysteine (µmol/L)</b>                 | 6.9 (3.6, 14.3)                                                             | 7.1 (3, 17.8)                                                               | 5.6 (3.4, 12.5)                                                               | 0.602                                | 0.059                                 | 0.143                                 |
| <b>Cord blood hematology</b>                       |                                                                             |                                                                             |                                                                               |                                      |                                       |                                       |
| <b>Hemoglobin (gm/L)</b>                           | 139 (118, 176)                                                              | 136 (126, 167)                                                              | 148 (127, 165)                                                                | 0.774                                | <b>0.038</b>                          | <b>0.048</b>                          |
| <b>White blood cell count (*10<sup>3</sup>/uL)</b> | 14.2 (10.5, 18.2)                                                           | 14.9 (10.0, 21.4)                                                           | 12.9 (8.4, 21.7)                                                              | 0.719                                | 0.332                                 | 0.493                                 |
| <b>Granulocytes count (*10<sup>3</sup>/uL)</b>     | 7.9 (5.1, 11.5)                                                             | 7.6 (5.2, 12.7)                                                             | 7.2 (3.7, 12.2)                                                               | 0.949                                | 0.328                                 | 0.455                                 |
| <b>Lymphocyte (*10<sup>3</sup>/uL)</b>             | 5.3 (3.6, 6.8)                                                              | 5.0 (3.4, 9.1)                                                              | 5.2 (3.2, 8.9)                                                                | 0.387                                | 0.666                                 | 0.714                                 |
| <b>Monocyte (*10<sup>3</sup>/uL)</b>               | 0.8 (0.2, 2.5)                                                              | 1.0 (0.3, 1.8)                                                              | 0.8 (0.4, 2.2)                                                                | 0.387                                | 0.29                                  | 0.944                                 |
| <b>Red blood cell count</b>                        | 4.0 (3.4, 4.8)                                                              | 3.9 (3.4, 4.7)                                                              | 4.4 (3.4, 4.8)                                                                | 0.798                                | <b>0.008</b>                          | <b>0.036</b>                          |

It is made available under a [CC-BY 4.0 International license](#) .

| (*10 <sup>6</sup> /uL)                          |                         |                         |                         |       |       |       |
|-------------------------------------------------|-------------------------|-------------------------|-------------------------|-------|-------|-------|
| <b>Platelet count</b><br>(*10 <sup>3</sup> /uL) | 272.5 (187.4,<br>348.8) | 270.0 (173.2,<br>384.4) | 245.0 (159.9,<br>339.7) | 0.439 | 0.321 | 0.054 |

**Note:** IQR: Inter Quartile Range, plp: pyridoxal 5 $\beta$ -phosphate, pyx: pyridoxine; values represent median (IQR); P-values for between group comparison calculated by Mann-Whitney U test and for multi-group comparison by Kruskal Wallis test. P - Value is calculated by KRUSKAL WALLIS.

**Table 3:** Top 10 genes that are differentially expressed between Placebo and B12+MMN groups.

| Sr. No. | Gene Symbol    | B12+MMN Vs Placebo |              | B12 alone Vs Placebo |              | Chromosomal location |
|---------|----------------|--------------------|--------------|----------------------|--------------|----------------------|
|         |                | log2FC             | Adj. P-value | log2FC               | Adj. P-value |                      |
| 1       | <i>KIF14</i>   | -1.248             | 0.009        | -0.731               | 1            | 1q32.1               |
| 2       | <i>KNL1</i>    | -1.203             | 0.009        | -0.747               | 0.93         | 15q15.1              |
| 3       | <i>KIF15</i>   | -1.114             | 0.013        | -0.562               | 1            | 3p21.31              |
| 4       | <i>DEPDC1</i>  | -1.319             | 0.014        | -0.864               | 0.958        | 1p31.3               |
| 5       | <i>TOP2A</i>   | -1.085             | 0.014        | -0.56                | 1            | 17q21.2              |
| 6       | <b>CDCA2</b>   | <b>-1.206</b>      | <b>0.016</b> | <b>-1.197</b>        | <b>0.032</b> | <b>8p21.2</b>        |
| 7       | <i>ESCO2</i>   | -1.243             | 0.016        | -0.773               | 1            | 8p21.1               |
| 8       | <i>SKA1</i>    | -1.353             | 0.016        | -0.815               | 1            | 18q21.1              |
| 9       | <i>TPX2</i>    | -1.073             | 0.016        | -0.729               | 0.93         | 20q11.21             |
| 10      | <i>TRBV7-2</i> | 1.02               | 0.016        | 0.616                | 1            | 7q34                 |

# Figure 1

A

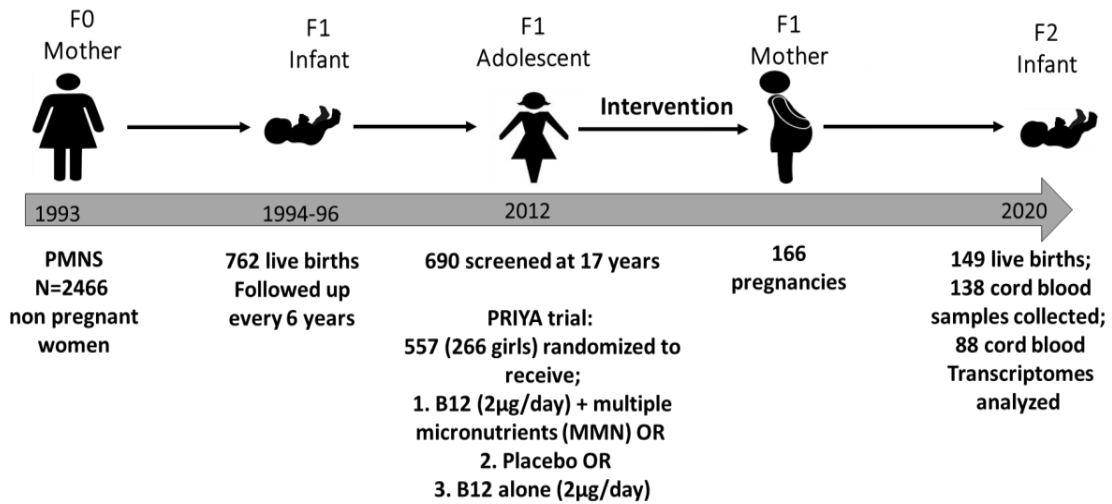

B

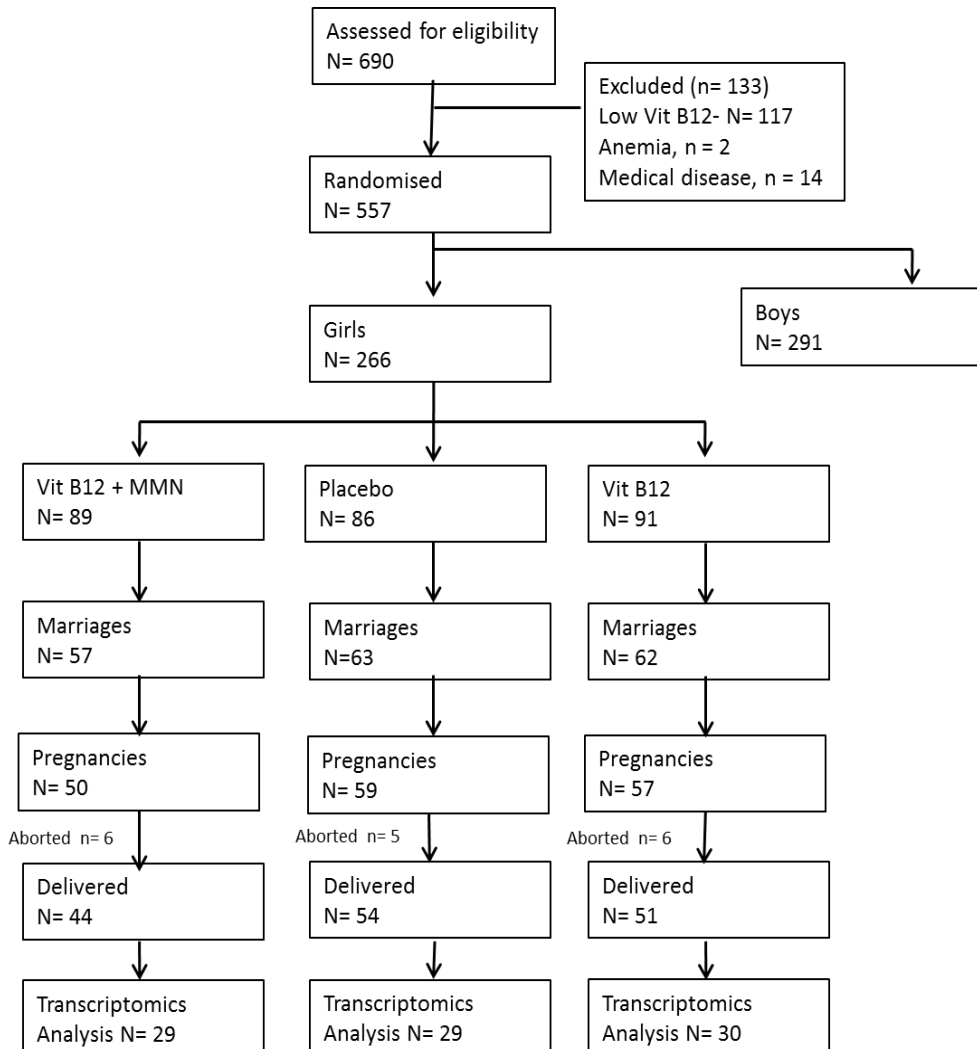

# Figure 2

It is made available under a [CC-BY 4.0 International license](https://creativecommons.org/licenses/by/4.0/).

## A

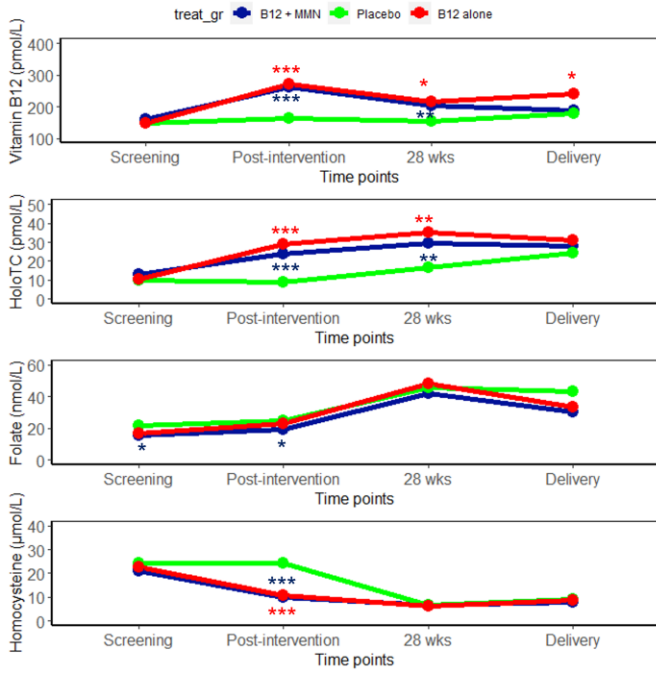

## B

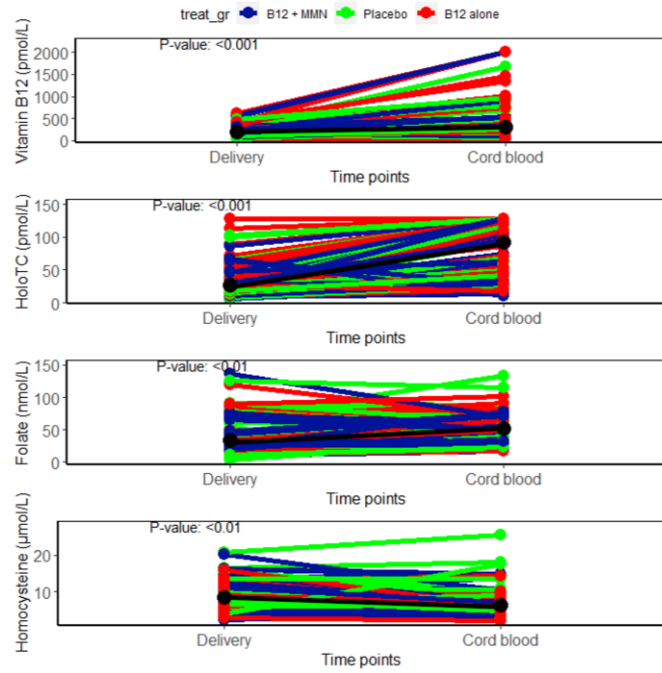





# Figure 4

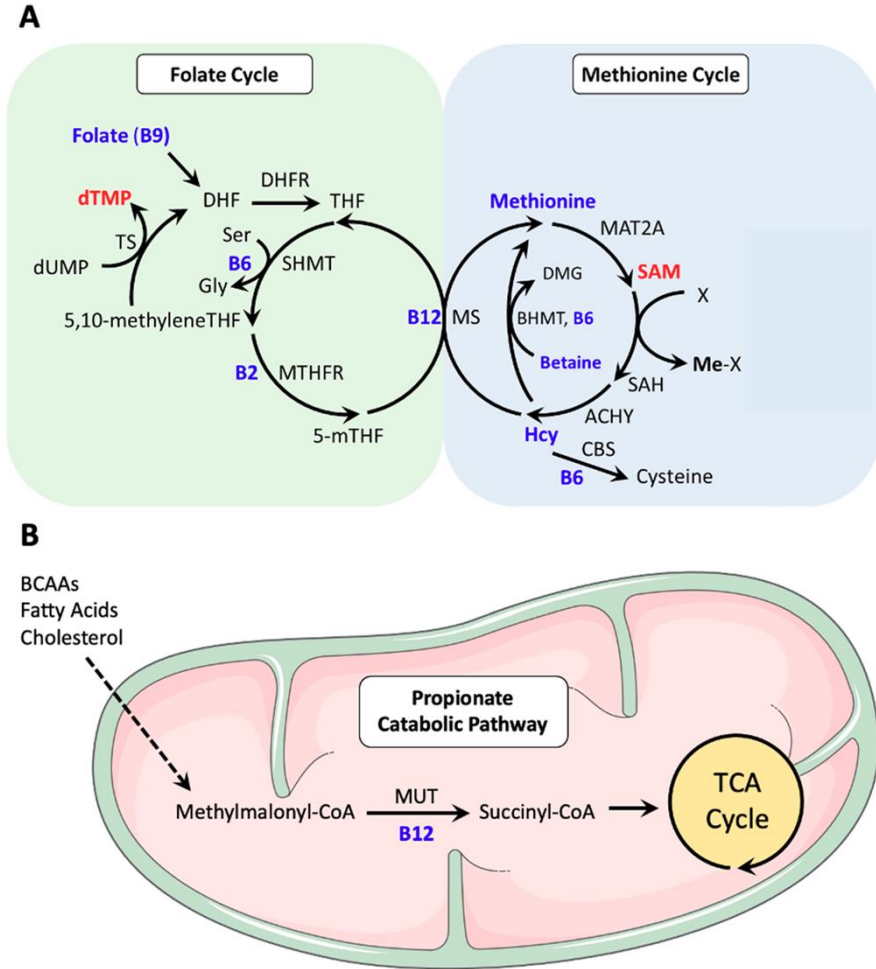

Source: https://medrxiv.org/content/10.1101/2021.08.25.21262585.full.pdf
