# Supplementary material for: Differential expression of genes influencing mitotic processes in cord blood mononuclear cells after a pre-conceptional micronutrient-based randomized controlled trial: Pune Rural Intervention in Young Adolescents (PRIYA)
Source: bioRxiv or medRxiv preprint supplement (doi:10.1101/2021.08.25.21262585), 2022-12-28
Supplement: Supplementary file [file media-4.pdf]

| REAC                                                           |                 | stats                   |                           |
|----------------------------------------------------------------|-----------------|-------------------------|---------------------------|
| Term name                                                      | Term ID         | Padj                    | -log <sub>10</sub> (Padj) |
| Cell Cycle                                                     | REACR-HSA-16... | 3.134×10 <sup>-31</sup> | 31.49                     |
| Cell Cycle, Mitotic                                            | REACR-HSA-69... | 3.760×10 <sup>-28</sup> | 28.49                     |
| Mitotic Prometaphase                                           | REACR-HSA-68... | 1.828×10 <sup>-16</sup> | 16.24                     |
| Cell Cycle Checkpoints                                         | REACR-HSA-69... | 2.949×10 <sup>-16</sup> | 16.03                     |
| M Phase                                                        | REACR-HSA-68... | 6.334×10 <sup>-16</sup> | 15.80                     |
| Resolution of Sister Chromatid Cohesion                        | REACR-HSA-25... | 1.047×10 <sup>-13</sup> | 13.00                     |
| Mitotic Spindle Checkpoint                                     | REACR-HSA-69... | 7.437×10 <sup>-13</sup> | 12.85                     |
| Mitotic Anaphase                                               | REACR-HSA-68... | 1.374×10 <sup>-12</sup> | 12.06                     |
| Mitotic Metaphase and Anaphase                                 | REACR-HSA-25... | 1.473×10 <sup>-12</sup> | 12.03                     |
| Amplification of signal from unattached kinetochores via a ... | REACR-HSA-14... | 3.336×10 <sup>-12</sup> | 11.99                     |
| Amplification of signal from the kinetochores                  | REACR-HSA-14... | 3.336×10 <sup>-12</sup> | 11.99                     |
| Separation of Sister Chromatids                                | REACR-HSA-24... | 4.229×10 <sup>-11</sup> | 10.59                     |
| EML4 and NUDC in mitotic spindle formation                     | REACR-HSA-96... | 5.246×10 <sup>-11</sup> | 10.52                     |
| RHO GTPases Activate Formins                                   | REACR-HSA-56... | 4.019×10 <sup>-10</sup> | 9.39                      |
| RHO GTPase Effectors                                           | REACR-HSA-19... | 5.553×10 <sup>-8</sup>  | 7.25                      |
| Kinesins                                                       | REACR-HSA-98... | 1.154×10 <sup>-7</sup>  | 6.94                      |
| G2/M Transition                                                | REACR-HSA-69... | 5.007×10 <sup>-7</sup>  | 6.30                      |
| Mitotic G2-G2/M phases                                         | REACR-HSA-45... | 5.580×10 <sup>-7</sup>  | 6.25                      |
| Signaling by Rho GTPases                                       | REACR-HSA-19... | 3.579×10 <sup>-6</sup>  | 5.44                      |
| Signaling by Rho GTPases, Miro GTPases and RHOBTB3             | REACR-HSA-97... | 4.922×10 <sup>-6</sup>  | 5.30                      |
| COP1-dependent Golgi-to-ER retrograde traffic                  | REACR-HSA-68... | 6.715×10 <sup>-6</sup>  | 5.17                      |
| Factors involved in megakaryocyte development and platel...    | REACR-HSA-98... | 3.076×10 <sup>-5</sup>  | 4.51                      |
| Cyclin A/B1/B2 associated events during G2/M transition        | REACR-HSA-69... | 3.666×10 <sup>-5</sup>  | 4.43                      |
| Golgi-to-ER retrograde transport                               | REACR-HSA-88... | 6.805×10 <sup>-5</sup>  | 4.16                      |
| Polo-like kinase mediated events                               | REACR-HSA-15... | 2.227×10 <sup>-4</sup>  | 3.65                      |
| AURKA Activation by TPX2                                       | REACR-HSA-88... | 3.593×10 <sup>-4</sup>  | 3.44                      |
| Intra-Golgi and retrograde Golgi-to-ER traffic                 | REACR-HSA-68... | 1.621×10 <sup>-3</sup>  | 2.79                      |
| Mitotic G1 phase and G1/S transition                           | REACR-HSA-45... | 2.042×10 <sup>-3</sup>  | 2.69                      |
| G0 and Early G1                                                | REACR-HSA-15... | 2.347×10 <sup>-3</sup>  | 2.63                      |
| Condensation of Prometaphase Chromosomes                       | REACR-HSA-25... | 6.105×10 <sup>-3</sup>  | 2.21                      |
| MHC class II antigen presentation                              | REACR-HSA-21... | 8.845×10 <sup>-3</sup>  | 2.05                      |
| APC/Cdc20 mediated degradation of cell cycle proteins prio...  | REACR-HSA-17... | 9.332×10 <sup>-3</sup>  | 2.03                      |
| APC/Cdc20 mediated degradation of mitotic proteins             | REACR-HSA-17... | 1.063×10 <sup>-2</sup>  | 1.97                      |
| Activation of APC/C and APC/Cdc20 mediated degradatio...       | REACR-HSA-17... | 1.132×10 <sup>-2</sup>  | 1.94                      |
| G1/S Transition                                                | REACR-HSA-69... | 1.210×10 <sup>-2</sup>  | 1.91                      |
| Chromosome Maintenance                                         | REACR-HSA-73... | 1.765×10 <sup>-2</sup>  | 1.75                      |
| Regulation of PLK1 Activity at G2/M Transition                 | REACR-HSA-25... | 1.827×10 <sup>-2</sup>  | 1.73                      |
| Regulation of mitotic cell cycle                               | REACR-HSA-45... | 2.159×10 <sup>-2</sup>  | 1.66                      |
| APC/C-mediated degradation of cell cycle proteins              | REACR-HSA-17... | 2.159×10 <sup>-2</sup>  | 1.66                      |
| Phosphorylation of proteins involved in the G2/M transition... | REACR-HSA-17... | 2.495×10 <sup>-2</sup>  | 1.60                      |
| S Phase                                                        | REACR-HSA-69... | 3.997×10 <sup>-2</sup>  | 1.40                      |

1 to 41 of 41    |< < Page 1 of 1 > >|

| WP                            |           | stats                  |             |                       |    |      |      |      |        |        |        |        |        |        |        |        |        |        |        |        |        |        |        |        |        |        |        |        |        |        |        |        |        |        |        |        |        |        |        |        |        |        |        |        |        |        |        |        |        |        |        |        |        |        |        |        |        |        |        |        |        |        |        |        |        |        |        |        |        |        |        |        |        |        |        |        |        |        |        |        |        |        |        |        |        |        |        |        |        |        |        |        |        |        |        |        |        |        |        |        |        |        |        |        |        |        |        |        |        |        |        |        |        |        |        |        |        |        |        |        |        |        |        |        |        |        |        |        |        |        |        |        |        |        |        |        |        |        |        |        |        |        |        |        |        |        |        |        |        |        |        |        |        |        |        |        |        |        |        |        |        |        |        |        |        |        |        |        |        |        |        |        |        |        |        |        |        |        |        |        |        |        |        |        |        |        |        |        |        |        |        |        |        |        |        |        |        |        |        |        |        |        |        |        |        |        |        |        |        |        |        |        |        |        |        |        |        |        |        |        |        |        |        |        |        |        |        |        |        |        |        |        |        |        |        |        |        |        |        |        |        |        |        |        |        |        |        |        |        |        |        |        |        |        |        |        |        |        |        |        |        |        |        |        |        |        |        |        |        |        |        |        |        |        |        |        |        |        |        |        |        |        |        |        |        |        |        |        |        |        |        |        |        |        |        |        |        |        |        |        |        |        |        |        |        |        |        |        |        |        |        |        |        |        |        |        |        |        |        |        |        |        |        |        |        |        |        |        |        |        |        |        |        |        |        |        |        |        |        |        |        |        |        |        |        |        |        |        |        |        |        |        |        |        |        |        |        |        |        |        |        |        |        |        |        |        |        |        |        |        |        |        |        |        |        |        |        |        |        |        |        |        |        |        |        |        |        |        |        |        |        |        |        |        |        |        |        |        |        |        |        |        |        |        |        |        |  |  |  |  |  |  |  |  |  |  |  |  |  |  |  |  |  |  |  |  |  |  |  |  |  |  |  |  |  |  |  |  |  |  |  |  |  |  |  |  |  |  |  |  |  |  |  |  |  |  |  |  |  |  |  |  |  |  |  |  |  |  |  |  |  |  |  |  |  |  |  |  |  |  |  |  |  |  |  |  |  |  |  |  |  |  |  |  |  |  |  |  |  |  |  |  |  |  |  |  |  |  |  |  |  |  |  |  |  |  |  |  |  |  |  |  |  |  |  |  |  |  |  |  |  |  |  |  |  |  |  |  |  |  |  |  |  |  |  |  |  |  |  |  |  |  |  |  |  |  |  |  |  |  |  |  |  |  |  |  |  |  |  |  |  |  |  |  |  |  |  |  |  |  |  |  |  |  |  |  |  |  |  |  |  |  |  |  |  |  |  |  |  |  |  |  |  |  |  |  |  |  |  |  |  |  |  |  |  |  |  |  |  |  |  |  |  |  |  |  |  |  |  |  |  |  |  |  |  |  |  |  |  |  |  |  |  |  |  |  |  |  |  |  |  |  |  |  |  |  |  |  |  |  |  |  |  |  |  |  |  |  |  |    |
|-------------------------------|-----------|------------------------|-------------|-----------------------|----|------|------|------|--------|--------|--------|--------|--------|--------|--------|--------|--------|--------|--------|--------|--------|--------|--------|--------|--------|--------|--------|--------|--------|--------|--------|--------|--------|--------|--------|--------|--------|--------|--------|--------|--------|--------|--------|--------|--------|--------|--------|--------|--------|--------|--------|--------|--------|--------|--------|--------|--------|--------|--------|--------|--------|--------|--------|--------|--------|--------|--------|--------|--------|--------|--------|--------|--------|--------|--------|--------|--------|--------|--------|--------|--------|--------|--------|--------|--------|--------|--------|--------|--------|--------|--------|--------|--------|--------|--------|--------|--------|--------|--------|--------|--------|--------|--------|--------|--------|--------|--------|--------|--------|--------|--------|--------|--------|--------|--------|--------|--------|--------|--------|--------|--------|--------|--------|--------|--------|--------|--------|--------|--------|--------|--------|--------|--------|--------|--------|--------|--------|--------|--------|--------|--------|--------|--------|--------|--------|--------|--------|--------|--------|--------|--------|--------|--------|--------|--------|--------|--------|--------|--------|--------|--------|--------|--------|--------|--------|--------|--------|--------|--------|--------|--------|--------|--------|--------|--------|--------|--------|--------|--------|--------|--------|--------|--------|--------|--------|--------|--------|--------|--------|--------|--------|--------|--------|--------|--------|--------|--------|--------|--------|--------|--------|--------|--------|--------|--------|--------|--------|--------|--------|--------|--------|--------|--------|--------|--------|--------|--------|--------|--------|--------|--------|--------|--------|--------|--------|--------|--------|--------|--------|--------|--------|--------|--------|--------|--------|--------|--------|--------|--------|--------|--------|--------|--------|--------|--------|--------|--------|--------|--------|--------|--------|--------|--------|--------|--------|--------|--------|--------|--------|--------|--------|--------|--------|--------|--------|--------|--------|--------|--------|--------|--------|--------|--------|--------|--------|--------|--------|--------|--------|--------|--------|--------|--------|--------|--------|--------|--------|--------|--------|--------|--------|--------|--------|--------|--------|--------|--------|--------|--------|--------|--------|--------|--------|--------|--------|--------|--------|--------|--------|--------|--------|--------|--------|--------|--------|--------|--------|--------|--------|--------|--------|--------|--------|--------|--------|--------|--------|--------|--------|--------|--------|--------|--------|--------|--------|--------|--------|--------|--------|--------|--------|--------|--------|--------|--------|--------|--------|--------|--------|--------|--------|--------|--------|--------|--------|--------|--------|--------|--------|--------|--------|--------|--------|--------|--------|--------|--------|--------|--------|--------|--------|--------|--------|--------|--------|--------|--------|--------|--------|--------|--------|--------|--------|--------|--------|--------|--------|--------|--------|--------|--------|--------|--------|--------|--------|--------|--------|--------|--------|--------|--------|--------|--------|--------|--------|--------|--|--|--|--|--|--|--|--|--|--|--|--|--|--|--|--|--|--|--|--|--|--|--|--|--|--|--|--|--|--|--|--|--|--|--|--|--|--|--|--|--|--|--|--|--|--|--|--|--|--|--|--|--|--|--|--|--|--|--|--|--|--|--|--|--|--|--|--|--|--|--|--|--|--|--|--|--|--|--|--|--|--|--|--|--|--|--|--|--|--|--|--|--|--|--|--|--|--|--|--|--|--|--|--|--|--|--|--|--|--|--|--|--|--|--|--|--|--|--|--|--|--|--|--|--|--|--|--|--|--|--|--|--|--|--|--|--|--|--|--|--|--|--|--|--|--|--|--|--|--|--|--|--|--|--|--|--|--|--|--|--|--|--|--|--|--|--|--|--|--|--|--|--|--|--|--|--|--|--|--|--|--|--|--|--|--|--|--|--|--|--|--|--|--|--|--|--|--|--|--|--|--|--|--|--|--|--|--|--|--|--|--|--|--|--|--|--|--|--|--|--|--|--|--|--|--|--|--|--|--|--|--|--|--|--|--|--|--|--|--|--|--|--|--|--|--|--|--|--|--|--|--|--|--|--|--|--|--|--|--|--|--|--|----|
| Term name                     | Term ID   | Padj                   | 0           | $-\log_{10}(P_{adj})$ | 1e | RTN4 | RTN5 | RTN6 | ORF113 | ORF114 | ORF115 | ORF116 | ORF117 | ORF118 | ORF119 | ORF120 | ORF121 | ORF122 | ORF123 | ORF124 | ORF125 | ORF126 | ORF127 | ORF128 | ORF129 | ORF130 | ORF131 | ORF132 | ORF133 | ORF134 | ORF135 | ORF136 | ORF137 | ORF138 | ORF139 | ORF140 | ORF141 | ORF142 | ORF143 | ORF144 | ORF145 | ORF146 | ORF147 | ORF148 | ORF149 | ORF150 | ORF151 | ORF152 | ORF153 | ORF154 | ORF155 | ORF156 | ORF157 | ORF158 | ORF159 | ORF160 | ORF161 | ORF162 | ORF163 | ORF164 | ORF165 | ORF166 | ORF167 | ORF168 | ORF169 | ORF170 | ORF171 | ORF172 | ORF173 | ORF174 | ORF175 | ORF176 | ORF177 | ORF178 | ORF179 | ORF180 | ORF181 | ORF182 | ORF183 | ORF184 | ORF185 | ORF186 | ORF187 | ORF188 | ORF189 | ORF190 | ORF191 | ORF192 | ORF193 | ORF194 | ORF195 | ORF196 | ORF197 | ORF198 | ORF199 | ORF200 | ORF201 | ORF202 | ORF203 | ORF204 | ORF205 | ORF206 | ORF207 | ORF208 | ORF209 | ORF210 | ORF211 | ORF212 | ORF213 | ORF214 | ORF215 | ORF216 | ORF217 | ORF218 | ORF219 | ORF220 | ORF221 | ORF222 | ORF223 | ORF224 | ORF225 | ORF226 | ORF227 | ORF228 | ORF229 | ORF230 | ORF231 | ORF232 | ORF233 | ORF234 | ORF235 | ORF236 | ORF237 | ORF238 | ORF239 | ORF240 | ORF241 | ORF242 | ORF243 | ORF244 | ORF245 | ORF246 | ORF247 | ORF248 | ORF249 | ORF250 | ORF251 | ORF252 | ORF253 | ORF254 | ORF255 | ORF256 | ORF257 | ORF258 | ORF259 | ORF260 | ORF261 | ORF262 | ORF263 | ORF264 | ORF265 | ORF266 | ORF267 | ORF268 | ORF269 | ORF270 | ORF271 | ORF272 | ORF273 | ORF274 | ORF275 | ORF276 | ORF277 | ORF278 | ORF279 | ORF280 | ORF281 | ORF282 | ORF283 | ORF284 | ORF285 | ORF286 | ORF287 | ORF288 | ORF289 | ORF290 | ORF291 | ORF292 | ORF293 | ORF294 | ORF295 | ORF296 | ORF297 | ORF298 | ORF299 | ORF300 | ORF301 | ORF302 | ORF303 | ORF304 | ORF305 | ORF306 | ORF307 | ORF308 | ORF309 | ORF310 | ORF311 | ORF312 | ORF313 | ORF314 | ORF315 | ORF316 | ORF317 | ORF318 | ORF319 | ORF320 | ORF321 | ORF322 | ORF323 | ORF324 | ORF325 | ORF326 | ORF327 | ORF328 | ORF329 | ORF330 | ORF331 | ORF332 | ORF333 | ORF334 | ORF335 | ORF336 | ORF337 | ORF338 | ORF339 | ORF340 | ORF341 | ORF342 | ORF343 | ORF344 | ORF345 | ORF346 | ORF347 | ORF348 | ORF349 | ORF350 | ORF351 | ORF352 | ORF353 | ORF354 | ORF355 | ORF356 | ORF357 | ORF358 | ORF359 | ORF360 | ORF361 | ORF362 | ORF363 | ORF364 | ORF365 | ORF366 | ORF367 | ORF368 | ORF369 | ORF370 | ORF371 | ORF372 | ORF373 | ORF374 | ORF375 | ORF376 | ORF377 | ORF378 | ORF379 | ORF380 | ORF381 | ORF382 | ORF383 | ORF384 | ORF385 | ORF386 | ORF387 | ORF388 | ORF389 | ORF390 | ORF391 | ORF392 | ORF393 | ORF394 | ORF395 | ORF396 | ORF397 | ORF398 | ORF399 | ORF400 | ORF401 | ORF402 | ORF403 | ORF404 | ORF405 | ORF406 | ORF407 | ORF408 | ORF409 | ORF410 | ORF411 | ORF412 | ORF413 | ORF414 | ORF415 | ORF416 | ORF417 | ORF418 | ORF419 | ORF420 | ORF421 | ORF422 | ORF423 | ORF424 | ORF425 | ORF426 | ORF427 | ORF428 | ORF429 | ORF430 | ORF431 | ORF432 | ORF433 | ORF434 | ORF435 | ORF436 | ORF437 | ORF438 | ORF439 | ORF440 | ORF441 | ORF442 | ORF443 | ORF444 | ORF445 | ORF446 | ORF447 | ORF448 | ORF449 | ORF450 | ORF451 | ORF452 | ORF453 | ORF454 | ORF455 | ORF456 | ORF457 | ORF458 | ORF459 | ORF460 | ORF461 | ORF462 | ORF463 | ORF464 | ORF465 | ORF466 | ORF467 | ORF468 | ORF469 | ORF470 | ORF471 | ORF472 | ORF473 | ORF474 | ORF475 | ORF476 | ORF477 | ORF478 | ORF479 | ORF480 | ORF481 | ORF482 | ORF483 | ORF484 | ORF485 | ORF486 | ORF487 | ORF488 | ORF489 | ORF490 | ORF491 | ORF492 | ORF493 | ORF494 | ORF495 | ORF496 | ORF497 | ORF498 | ORF499 | ORF500 | ORF501 | ORF502 | ORF503 | ORF504 | ORF505 | ORF506 | ORF507 | ORF508 | ORF509 | ORF510 |  |  |  |  |  |  |  |  |  |  |  |  |  |  |  |  |  |  |  |  |  |  |  |  |  |  |  |  |  |  |  |  |  |  |  |  |  |  |  |  |  |  |  |  |  |  |  |  |  |  |  |  |  |  |  |  |  |  |  |  |  |  |  |  |  |  |  |  |  |  |  |  |  |  |  |  |  |  |  |  |  |  |  |  |  |  |  |  |  |  |  |  |  |  |  |  |  |  |  |  |  |  |  |  |  |  |  |  |  |  |  |  |  |  |  |  |  |  |  |  |  |  |  |  |  |  |  |  |  |  |  |  |  |  |  |  |  |  |  |  |  |  |  |  |  |  |  |  |  |  |  |  |  |  |  |  |  |  |  |  |  |  |  |  |  |  |  |  |  |  |  |  |  |  |  |  |  |  |  |  |  |  |  |  |  |  |  |  |  |  |  |  |  |  |  |  |  |  |  |  |  |  |  |  |  |  |  |  |  |  |  |  |  |  |  |  |  |  |  |  |  |  |  |  |  |  |  |  |  |  |  |  |  |  |  |  |  |  |  |  |  |  |  |  |  |  |  |  |  |  |  |  |  |  |  |  |  |  |  |  |  |  |  |    |
| Retinoblastoma gene in cancer | WP-WP2446 | 7.032×10 <sup>-9</sup> | <div></div> |                       |    |      |      |      |        |        |        |        |        |        |        |        |        |        |        |        |        |        |        |        |        |        |        |        |        |        |        |        |        |        |        |        |        |        |        |        |        |        |        |        |        |        |        |        |        |        |        |        |        |        |        |        |        |        |        |        |        |        |        |        |        |        |        |        |        |        |        |        |        |        |        |        |        |        |        |        |        |        |        |        |        |        |        |        |        |        |        |        |        |        |        |        |        |        |        |        |        |        |        |        |        |        |        |        |        |        |        |        |        |        |        |        |        |        |        |        |        |        |        |        |        |        |        |        |        |        |        |        |        |        |        |        |        |        |        |        |        |        |        |        |        |        |        |        |        |        |        |        |        |        |        |        |        |        |        |        |        |        |        |        |        |        |        |        |        |        |        |        |        |        |        |        |        |        |        |        |        |        |        |        |        |        |        |        |        |        |        |        |        |        |        |        |        |        |        |        |        |        |        |        |        |        |        |        |        |        |        |        |        |        |        |        |        |        |        |        |        |        |        |        |        |        |        |        |        |        |        |        |        |        |        |        |        |        |        |        |        |        |        |        |        |        |        |        |        |        |        |        |        |        |        |        |        |        |        |        |        |        |        |        |        |        |        |        |        |        |        |        |        |        |        |        |        |        |        |        |        |        |        |        |        |        |        |        |        |        |        |        |        |        |        |        |        |        |        |        |        |        |        |        |        |        |        |        |        |        |        |        |        |        |        |        |        |        |        |        |        |        |        |        |        |        |        |        |        |        |        |        |        |        |        |        |        |        |        |        |        |        |        |        |        |        |        |        |        |        |        |        |        |        |        |        |        |        |        |        |        |        |        |        |        |        |        |        |        |        |        |        |        |        |        |        |        |        |        |        |        |        |        |        |        |        |        |        |        |        |        |        |        |        |        |        |        |        |        |        |        |        |        |        |        |        |  |  |  |  |  |  |  |  |  |  |  |  |  |  |  |  |  |  |  |  |  |  |  |  |  |  |  |  |  |  |  |  |  |  |  |  |  |  |  |  |  |  |  |  |  |  |  |  |  |  |  |  |  |  |  |  |  |  |  |  |  |  |  |  |  |  |  |  |  |  |  |  |  |  |  |  |  |  |  |  |  |  |  |  |  |  |  |  |  |  |  |  |  |  |  |  |  |  |  |  |  |  |  |  |  |  |  |  |  |  |  |  |  |  |  |  |  |  |  |  |  |  |  |  |  |  |  |  |  |  |  |  |  |  |  |  |  |  |  |  |  |  |  |  |  |  |  |  |  |  |  |  |  |  |  |  |  |  |  |  |  |  |  |  |  |  |  |  |  |  |  |  |  |  |  |  |  |  |  |  |  |  |  |  |  |  |  |  |  |  |  |  |  |  |  |  |  |  |  |  |  |  |  |  |  |  |  |  |  |  |  |  |  |  |  |  |  |  |  |  |  |  |  |  |  |  |  |  |  |  |  |  |  |  |  |  |  |  |  |  |  |  |  |  |  |  |  |  |  |  |  |  |  |  |  |  |  |  |  |  |  |  |  | </ |

1 to 8 of 8    |< < Page 1 of 1 > >|

[illegible]

1 to 8 of 8 |< < Page 1 of 1 > >|
